# Supplementary material for: Intestinal GCN2 controls Drosophila systemic growth in response to Lactiplantibacillus plantarum symbiotic cues encoded by r/tRNA operons
Source: eLife. 2023 Jun 9;12:e76584. doi: 10.7554/eLife.76584 (PMC10289812; doi:10.7554/eLife.76584)
Supplement: Figure 1—figure supplement 1—source data 1. [file elife-76584-fig1-figsupp1-data1.xlsx]

## Sheet: Sheet1
Figure S1A-time of development (%emerged pupae over time)
	GF-V100	GF-V100	GF-V100	GF-V100	GF-V100	Lp-V100	Lp-V100	Lp-V100	Lp-V100	Lp-V100	GF-V20	GF-V20	GF-V20	GF-V20	GF-V20	Lp-V20	Lp-V20	Lp-V20	Lp-V20	Lp-V20	GF-V10	GF-V10	GF-V10	GF-V10	GF-V10	Lp-V10	Lp-V10	Lp-V10	Lp-V10	Lp-V10
1	0	0	0	0	0	0	0	0	0	0	0	0	0	0	0	0	0	0	0	0	0	0	0	0	0	0	0	0	0	0
2	0	0	0	0	0	0	0	0	0	0	0	0	0	0	0	0	0	0	0	0	0	0	0	0	0	0	0	0	0	0
3	0	0	0	0	0	0	0	0	0	0	0	0	0	0	0	0	0	0	0	0	0	0	0	0	0	0	0	0	0	0
4	0	0	0	0	0	0	0	0	0	0	0	0	0	0	0	0	0	0	0	0	0	0	0	0	0	0	0	0	0	0
5	0	0	0	0	0	0	0	0	0	0	0	0	0	0	0	0	0	0	0	0	0	0	0	0	0	0	0	0	0	0
6	0	0	0	0	0	0	0	0	0	0	0	0	0	0	0	0	0	0	0	0	0	0	0	0	0	0	0	0	0	0
7	0	0	0	0	0	19.3548	40.7407	11.4286	62.5	26.4706	0	0	0	0	0	0	0	0	0	0	0	0	0	0	0	0	0	0	0	0
8	3.33333	8.82353	0	0	0	70.9677	74.0741	48.5714	87.5	61.7647	0	0	0	0	0	11.5385	19.2308	15.3846	15.3846	0	0	0	0	0	0	0	0	0	0	0
9	73.3333	76.4706	36.1111	51.1628	53.3333	96.7742	85.1852	91.4286	100	97.0588	0	0	0	0	0	30.7692	42.3077	57.6923	46.1538	21.4286	0	0	0	0	0	0	0	9.52	0	0
10	93.3333	97.0588	100	95.3488	93.3333	100	96.2963	97.1429	100	100	0	0	0	0	0	53.8462	61.5385	69.2308	69.2308	53.5714	0	0	0	0	0	0	4.76	33.33	0	0
11	96.6667	100	100	95.3488	100	100	96.2963	97.1429	100	100	0	0	0	0	0	76.9231	73.0769	73.0769	73.0769	75	0	0	0	0	0	18.75	28.57	66.67	13.33	25
12	96.6667	100	100	100	100	100	100	100	100	100	0	0	0	0	0	80.7692	88.4615	73.0769	76.9231	85.7143	0	0	0	0	0	62.5	66.67	85.71	53.33	43.75
13	100	100	100	100	100	100	100	100	100	100	0	0	0	0	0	96.1538	92.3077	73.0769	84.6154	89.2857	0	0	0	0	0	81.25	90.48	90.48	80	75
14	100	100	100	100	100	100	100	100	100	100	0	0	0	0	0	100	96.1538	80.7692	92.3077	89.2857	0	0	0	0	0	100	100	100	100	100
15	100	100	100	100	100	100	100	100	100	100	0	0	0	0	0	100	100	88.4615	100	96.4286	0	0	0	0	0	100	100	100	100	100
16	100	100	100	100	100	100	100	100	100	100	0	0	0	0	0	100	100	96.1538	100	100	0	0	0	0	0	100	100	100	100	100
17	100	100	100	100	100	100	100	100	100	100	0	0	0	0	0	100	100	100	100	100	0	0	0	0	0	100	100	100	100	100
18	100	100	100	100	100	100	100	100	100	100	0	0	0	0	0	100	100	100	100	100	0	0	0	0	0	100	100	100	100	100
19	100	100	100	100	100	100	100	100	100	100	0	0	0	0	0	100	100	100	100	100	0	0	0	0	0	100	100	100	100	100
Figure S1B-time of development (%emerged pupae over time)
	GF_V100	GF_V100	GF_V100	GF_V100	GF_V100	Lp_V100	Lp_V100	Lp_V100	Lp_V100	Lp_V100	GF_V200	GF_V200	GF_V200	GF_V200	GF_V200	Lp_V200	Lp_V200	Lp_V200	Lp_V200	Lp_V200
1	0	0	0	0	0	0	0	0	0	0	0	0	0	0	0	0	0	0	0	0
2	0	0	0	0	0	0	0	0	0	0	0	0	0	0	0	0	0	0	0	0
3	0	0	0	0	0	0	0	0	0	0	0	0	0	0	0	0	0	0	0	0
4	0	0	0	0	0	0	0	0	0	0	0	0	0	0	0	0	0	0	0	0
5	0	0	0	0	0	0	0	0	0	0	0	0	0	0	0	0	0	0	0	0
6	0	0	0	0	0	0	0	4.16667	0	0	0	0	0	0	0	0	0	11.5385	5.88235	18.1818
7	11.1111	14.8148	10.3448	2.85714	4.54545	46.6667	48	66.6667	28.2051	70.8333	15.3846	12	7.40741	15.3846	6.89655	65.2174	62.069	50	88.2353	90.9091
8	77.7778	74.0741	62.069	37.1429	54.5455	86.6667	100	83.3333	71.7949	100	69.2308	64	70.3704	76.9231	68.9655	91.3043	96.5517	80.7692	100	100
9	100	88.8889	100	91.4286	86.3636	93.3333	100	100	100	100	96.1538	100	92.5926	100	96.5517	95.6522	100	92.3077	100	100
10	100	92.5926	100	100	100	100	100	100	100	100	100	100	96.2963	100	100	100	100	100	100	100
11	100	96.2963	100	100	100	100	100	100	100	100	100	100	100	100	100	100	100	100	100	100
12	100	96.2963	100	100	100	100	100	100	100	100	100	100	100	100	100	100	100	100	100	100
13	100	100	100	100	100	100	100	100	100	100	100	100	100	100	100	100	100	100	100	100
14	100	100	100	100	100	100	100	100	100	100	100	100	100	100	100	100	100	100	100	100
15	100	100	100	100	100	100	100	100	100	100	100	100	100	100	100	100	100	100	100	100
16	100	100	100	100	100	100	100	100	100	100	100	100	100	100	100	100	100	100	100	100
FigureS1C-egg-to-pupa survival
GF-V100	GF-V100	GF-V100	GF-V100	GF-V100	Lp-V100	Lp-V100	Lp-V100	Lp-V100	Lp-V100	GF-MM	GF-MM	GF-MM	GF-MM	GF-MM
75	85	90	100	75	77.5	67.5	87.5	60	85	100	98	100	100	100
Figure S1D-time of development (%emerged pupae over time)
	GF	GF	GF	GF	GF	Lp	Lp	Lp	Lp	Lp	Lp-HK	Lp-HK	Lp-HK	Lp-HK
1	0	0	0,0000000*	0	0	0	0	0	0	0	0	0	0	0
2	0	0	0,0000000*	0	0	0	0	0	0	0	0	0	0	0
3	0	0	0,0000000*	0	0	0	0	0	0	0	0	0	0	0
4	0	0	0,0000000*	0	0	0	0	0	0	0	0	0	0	0
5	0	0	0,0000000*	0	0	0	0	0	0	0	0	0	0	0
6	0	0	0,0000000*	0	0	0	0	0	0	0	0	0	0	0
7	0	0	0,0000000*	0	0	28.5714	23.5294	46.6667	54.5455	81.8182	0	0	0	0
8	0	0	0,0000000*	0	0	78.5714	58.8235	73.3333	90.9091	100	0	0	0	0
9	0	0	0,0000000*	0	0	78.5714	70.5882	80	100	100	0	0	0	0
10	0	0	0,0000000*	0	0	92.8571	94.1176	93.3333	100	100	0	0	0	0
11	0	0	0,0000000*	0	0	92.8571	100	100	100	100	4.7619	10	10	0
12	18.1818	18.75	12,5000000*	21.4286	14.2857	92.8571	100	100	100	100	23.8095	50	40	46.1538
13	63.6364	37.5	37,5000000*	71.4286	50	100	100	100	100	100	71.4286	100	60	69.2308
14	63,6363636*	37,5000000*	37,5000000*	71,4285714*	50,0000000*	100,0000000*	100,0000000*	100,0000000*	100,0000000*	100,0000000*	71,42857140*	100,00000000*	60,00000000*	69,23076920*
15	95.4545	93.75	100,0000000*	92.8571	85.7143	100	100	100	100	100	100	100	90	84.6154
16	95,4545455*	93,7500000*	100,0000000*	92,8571429*	85,7142857*	100,0000000*	100,0000000*	100,0000000*	100,0000000*	100,0000000*	100,00000000*	100,00000000*	90,00000000*	84,61538460*
17	95,4545455*	93,7500000*	100,0000000*	92,8571429*	85,7142857*	100,0000000*	100,0000000*	100,0000000*	100,0000000*	100,0000000*	100,00000000*	100,00000000*	90,00000000*	84,61538460*
18	100	100	100,0000000*	100	100	100	100	100	100	100	100	100	100	100
19	100	100	100,0000000*	100	100	100	100	100	100	100	100	100	100	100
20	100	100	100,0000000*	100	100	100	100	100	100	100	100	100	100	100
21	100	100	100,0000000*	100	100	100	100	100	100	100	100	100	100	100
22	100	100	100,0000000*	100	100	100	100	100	100	100	100	100	100	100
Figure S1E-absorbance over time
	GF_Val40	GF_Val40	GF_Val40	GF_Val40	GF_Val40	Lp_Val40	Lp_Val40	Lp_Val40	Lp_Val40	Lp_Val40
0	0.044	0.064	0.04	0.082	0.044	0.096	0.128	0.112	0.048	0.15
1	0.468	0.334	0.27	0.418	0.41	0.284	0.294	0.278	0.238	0.226
2	0.372	0.426	0.428	0.572	0.408	1.138	0.514	0.592	0.35	0.518
3	0.504	0.456	0.318	0.494	0.302	0.41	0.466	0.328	0.852	0.384
4	0.444	0.516	0.416	0.564	0.524	0.518	0.408	0.418	0.436
7.5	0.582	0.692	0.558	0.594		0.454	0.652	0.538	0.552
24	0.56	0.398	0.712	0.344	0.776	0.858	0.494	0.394	0.524	0.356
Figure S1F-absorbance over time
	GF_Val100	GF_Val100	GF_Val100	GF_Val100	GF_Val100	GF_Val100	Lp_Val100	Lp_Val100	Lp_Val100	Lp_Val100	Lp_Val100	Lp_Val100
0	0.051	0.051	0.036	0.045	0.016		0.057	0.023	0.072	0.026	0.05
1	0.294	0.198	0.163	0.164	0.092	0.117	0.231	0.231	0.112	0.12	0.156	0.1
2	0.248	0.569	0.246	0.23	0.329		0.326	0.202	0.221	0.285	0.313
3	0.541	0.326	0.437	0.38	0.466		0.43	0.392	0.394	0.608	0.299
7.5	0.388	0.443	0.457	0.458	0.286		0.548	0.446	0.611	0.468
24	0.697	0.398	1,001*	0.486	0.483		0.388	0.459	0.382	0.356
