# Supplementary material for: Intestinal GCN2 controls Drosophila systemic growth in response to Lactiplantibacillus plantarum symbiotic cues encoded by r/tRNA operons
Source: eLife. 2023 Jun 9;12:e76584. doi: 10.7554/eLife.76584 (PMC10289812; doi:10.7554/eLife.76584)
Supplement: Figure 1—source data 1. [file elife-76584-fig1-data1.xlsx]

## Sheet: Sheet1
Figure 1A-median time of development of larvae reared on HD -70% each AA
	Arg	Arg	Arg	Arg	Arg	His	His	His	His	His	Ile	Ile	Ile	Ile	Ile	Leu	Leu	Leu	Leu	Leu	Lys	Lys	Lys	Lys	Lys	Met	Met	Met	Met	Met	Phe	Phe	Phe	Phe	Phe	Thr	Thr	Thr	Thr	Thr	Trp	Trp	Trp	Trp	Trp	Val	Val	Val	Val
GF	15.77	14.89	16.1	15.83	15	18.52	18.66	18.48	18.39	16.44	0	0	0	0	0	18.29	19.19	19.12	18.6	19.58	0	0	0	0	0	18.86	18.92	19.4	18.6	18.25	21	21,25*	21.37	20,50*	21.31	0	0	0	0	0	0	0	0	0	0	0	0	0	0
Lp	6.83333	7.6	7.82353	7.85714	7.42857	6.63636	7.25	7.45	7.2	6.85714	10.57	9.36	10.1	9.45	9.5	10.5	10.28	9.61	6.91	8.33	7.875	9	7.9	8.7	7.727	7.36364	7.66667	7.94118	6.95833	7.25	7.375	8.125	7.923	7.25	7.889	8.27778	9.63636	9.6	6.94444	8.14286	10.0833	12.6667	8.6875	9.78571	10.125	9.4375	9.8077	9	9.75
Figure 1B-median time of development of larvae reared on HD-60% each AA
	Arg	Arg	Arg	Arg	Arg	His	His	His	His	His	Ile	Ile	Ile	Ile	Ile	Leu	Leu	Leu	Leu	Leu	Lys	Lys	Lys	Lys	Lys	Met	Met	Met	Met	Met	Phe	Phe	Phe	Phe	Phe	Thr	Thr	Thr	Thr	Thr	Trp	Trp	Trp	Trp	Trp	Val	Val	Val	Val
GF	7.81	7.95	8.29	8.38	8.34	7.68	8.86	8.65	8.29	8.25	10.32	9.94	11.18	10.64	11.05	8.62	8.8	8.78	8.82	8.62	12.57	13.06	12.42	12.94	12.37	8.05	8.43	8.29	8.32	8.46	8.7	8.94	9.32	8.8	9.53	11.4	10.73	12.17	11.94	12.1	13	12.23	14	14.06	14.25	11.96	12.64	12	13.25
Lp	7.12	7.53	7.16	7.2	6.94	6.78	6.67	7.15	6.75	6.63	7.79	7.66	7.65	7.87	7.55	7.29	7.19	7.19	7.42	7.23	7.86	7.46	7.67	7.4	7.25	6.96	7.21	6.87	6.73	6.59	8.07	7.5	7.77	7.14	6.86	7.36	7.25	7.78	7.25	7.5	7.85	8.44	7.88	8.41	7	6.72	7.67	7.85	7.64
Figure 1C-time of development (%emerging pupa over time)
	Val100% GF	Val100% GF	Val100% GF	Val100% GF	Val100% GF	Val100 Lp	Val100 Lp	Val100 Lp	Val100 Lp	Val100 Lp	Val40 GF	Val40 GF	Val40 GF	Val40 GF	Val40 GF	Val40 Lp	Val40 Lp	Val40 Lp	Val40 Lp	Val40 Lp
1	0	0	0	0	0	0	0	0	0	0	0	0	0	0	0	0	0	0	0	0
2	0	0	0	0	0	0	0	0	0	0	0	0	0	0	0	0	0	0	0	0
3	0	0	0	0	0	0	0	0	0	0	0	0	0	0	0	0	0	0	0	0
4	0	0	0	0	0	0	0	0	0	0	0	0	0	0	0	0	0	0	0	0
5	0	0	0	0	0	0	0	0	0	0	0	0	0	0	0	0	0	0	0	0
6	0	0	0	0	0	0	0	0	0	0	0	0	0	0	0	0	0	0	0	0
7	0	0	0	0	0	19.3548	40.7407	11.4286	62.5	26.4706	0	0	0	0	0	0	18.75	2.941	6.897	1.786
8	3.33333	8.82353	0	0	0	70.9677	74.0741	48.5714	87.5	61.7647	0	0	0	0	0	46.875	34.375	26.471	65.517	16.071
9	73.3333	76.4706	36.1111	51.1628	53.3333	96.7742	85.1852	91.4286	100	97.0588	0	0	0	0	0	71.875	87.5	73.529	86.207	41.071
10	93.3333	97.0588	100	95.3488	93.3333	100	96.2963	97.1429	100	100	2.94118	6.25	0	5.71429	0	93.75	96.875	88.235	100	80.357
11	96.6667	100	100	95.3488	100	100	96.2963	97.1429	100	100	23.5294	18.75	13.8889	20	36.6667	100	96.875	100	100	98.214
12	96.6667	100	100	100	100	100	100	100	100	100	58.8235	43.75	36.1111	54.2857	60	100	100	100	100	100
13	100	100	100	100	100	100	100	100	100	100	88.2353	62.5	55.5556	80	70	100	100	100	100	100
14	100	100	100	100	100	100	100	100	100	100	100	81.25	77.7778	88.5714	73.3333	100	100	100	100	100
15	100	100	100	100	100	100	100	100	100	100	100	90.625	88.8889	91.4286	93.3333	100	100	100	100	100
16	100	100	100	100	100	100	100	100	100	100	100	93.75	88.8889	94.2857	93.3333	100	100	100	100	100
17	100	100	100	100	100	100	100	100	100	100	100	96.875	100	97.1429	96.6667	100	100	100	100	100
18	100	100	100	100	100	100	100	100	100	100	100	100	100	100	96.6667	100	100	100	100	100
19	100	100	100	100	100	100	100	100	100	100	100	100	100	100	100	100	100	100	100	100
Figure 1D time of development (%emerging pupa over time)
	GF-V40	GF-V40	GF-V40	GF-V40	GF-V40	Lp-V40	Lp-V40	Lp-V40	Lp-V40	Lp-V40	GF-V40+His	GF-V40+His	GF-V40+His	GF-V40+His	GF-V40+His	Lp-V40+His	Lp-V40+His	Lp-V40+His	Lp-V40+His	Lp-V40+His	GF-V40+Leu	GF-V40+Leu	GF-V40+Leu	GF-V40+Leu	GF-V40+Leu	Lp_V40+Leu	Lp_V40+Leu	Lp_V40+Leu	Lp_V40+Leu	Lp_V40+Leu	GF-V100	GF-V100	GF-V100	GF-V100	GF-V100	Lp-V100	Lp-V100	Lp-V100	Lp-V100	Lp-V100
1	0	0	0	0	0	0	0	0	0	0	0	0	0	0	0	0	0	0	0	0,000*	0	0	0	0	0	0	0	0	0	0	0	0	0	0	0	0	0	0	0	0,0000000*
2	0	0	0	0	0	0	0	0	0	0	0	0	0	0	0	0	0	0	0	0,000*	0	0	0	0	0	0	0	0	0	0	0	0	0	0	0	0	0	0	0	0,0000000*
3	0	0	0	0	0	0	0	0	0	0	0	0	0	0	0	0	0	0	0	0,000*	0	0	0	0	0	0	0	0	0	0	0	0	0	0	0	0	0	0	0	0,0000000*
4	0	0	0	0	0	0	0	0	0	0	0	0	0	0	0	0	0	0	0	0,000*	0	0	0	0	0	0	0	0	0	0	0	0	0	0	0	0	0	0	0	0,0000000*
5	0	0	0	0	0	0	0	0	0	0	0	0	0	0	0	0	0	0	0	0,000*	0	0	0	0	0	0	0	0	0	0	0	0	0	0	0	0	0	0	0	0,0000000*
6	0	0	0	0	0	0	0	0	0	0	0	0	0	0	0	0	0	0	0	0,000*	0	0	0	0	0	0	0	0	0	0	0	0	0	0	0	0	0	0	0	0,0000000*
7	0	0	0	0	0	52.9412	58.8235	50	22.2222	0	0	0	0	0	0	0	9.677	0	0	75,000*	0	0	0	0	0	0	0	0	0	12.5	3.0303	0	2.7027	0	2.85714	0	0	24	3.125	77,7777778*
8	0	0	0	0	0	82.3529	94.1176	100	33.3333	0	0	0	0	0	14.2857	9.375	19.355	5.263	5.263	75,000*	0	0	0	0	2.778	3.84615	11.6279	12.5	27.2727	65.625	33.3333	42.1053	45.9459	37.1429	25.7143	14.6341	25.9259	92	53.125	77,7777778*
9	0	0	0	0	0	94.1176	100	100	88.8889	29.4118	0	0	0	0	14.2857	50	61.29	31.579	47.368	100,000*	0	0	0	0	2.778	13.4615	44.186	32.5	59.0909	87.5	90.9091	92.1053	94.5946	82.8571	80	73.1707	59.2593	100	84.375	88,8888889*
10	0	0	0	0	0	100	100	100	100	68.6275	0	0	0	0	14.2857	87.5	90.323	81.579	86.842	100,000*	0	0	0	0	2.778	55.7692	69.7674	70	88.6364	96.875	93.9394	97.3684	100	91.4286	97.1429	97.561	88.8889	100	96.875	100,0000000*
11	6.66667	13.1579	2.08333	13.3333	5.40541	100	100	100	100	98.0392	7.69231	6.06061	11.6279	0	14.2857	100	96.774	97.368	100	100,000*	0	5.556	0	0	2.778	84.6154	90.6977	92.5	97.7273	100	100	100	100	94.2857	97.1429	100	100	100	100	100,0000000*
12	28.8889	36.8421	25	35.5556	27.027	100	100	100	100	100	15.3846	18.1818	25.5814	6.06061	26.1905	100	100	100	100	100,000*	9.375	8.333	6.25	5.882	11.111	92.3077	95.3488	97.5	100	100	100	100	100	100	100	100	100	100	100	100,0000000*
13	57.7778	76.3158	43.75	60	45.9459	100	100	100	100	100	33.3333	27.2727	46.5116	18.1818	42.8571	100	100	100	100	100,000*	31.25	36.111	15.625	35.294	36.111	96.1538	97.6744	100	100	100	100	100	100	100	100	100	100	100	100	100,0000000*
14	71.1111	97.3684	70.8333	82.2222	72.973	100	100	100	100	100	56.4103	36.3636	76.7442	48.4848	61.9048	100	100	100	100	100,000*	59.375	61.111	34.375	64.706	52.778	100	100	100	100	100	100	100	100	100	100	100	100	100	100	100,0000000*
15	91.1111	97.3684	81.25	88.8889	97.2973	100	100	100	100	100	66.6667	66.6667	83.7209	72.7273	80.9524	100	100	100	100	100,000*	84.375	72.222	62.5	88.235	80.556	100	100	100	100	100	100	100	100	100	100	100	100	100	100	100,0000000*
16	95.5556	100	91.6667	97.7778	100	100	100	100	100	100	84.6154	75.7576	95.3488	87.8788	90.4762	100	100	100	100	100,000*	93.75	91.667	75	91.176	86.111	100	100	100	100	100	100	100	100	100	100	100	100	100	100	100,0000000*
17	100	100	97.9167	100	100	100	100	100	100	100	94.8718	96.9697	97.6744	96.9697	95.2381	100	100	100	100	100,000*	96.875	100	87.5	94.118	88.889	100	100	100	100	100	100	100	100	100	100	100	100	100	100	100,0000000*
18	100	100	100	100	100	100	100	100	100	100	100	100	100	100	100	100	100	100	100	100,000*	100	100	100	100	100	100	100	100	100	100	100	100	100	100	100	100	100	100	100	100,0000000*
19	100	100	100	100	100	100	100	100	100	100	100	100	100	100	100	100	100	100	100	100,000*	100	100	100	100	100	100	100	100	100	100	100	100	100	100	100	100	100	100	100	100,0000000*
20	100	100	100	100	100	100	100	100	100	100	100	100	100	100	100	100	100	100	100	100,000*	100	100	100	100	100	100	100	100	100	100	100	100	100	100	100	100	100	100	100	100,0000000*
21	100	100	100	100	100	100	100	100	100	100	100	100	100	100	100	100	100	100	100	100,000*	100	100	100	100	100	100	100	100	100	100	100	100	100	100	100	100	100	100	100	100,0000000*
22	100	100	100	100	100	100	100	100	100	100	100	100	100	100	100	100	100	100	100	100,000*	100	100	100	100	100	100	100	100	100	100	100	100	100	100	100	100	100	100	100	100,0000000*
23	100	100	100	100	100	100	100	100	100	100	100	100	100	100	100	100	100	100	100	100,000*	100	100	100	100	100	100	100	100	100	100	100	100	100	100	100	100	100	100	100	100,0000000*
24	100	100	100	100	100	100	100	100	100	100	100	100	100	100	100	100	100	100	100	100,000*	100	100	100	100	100	100	100	100	100	100	100	100	100	100	100	100	100	100	100	100,0000000*
Figure 1E-Valine concentration in hemolymph
GF-imb			Lp-imb			GF-bal			Lp-bal
0.0343964	0.0457569	0.0483197	0.391332	0.320762	0.204074	0.284864	0.396351		0.325701	0.305125	0.298173
[truncated: 6 more columns]
