# Supplementary material for: Intestinal GCN2 controls Drosophila systemic growth in response to Lactiplantibacillus plantarum symbiotic cues encoded by r/tRNA operons
Source: eLife. 2023 Jun 9;12:e76584. doi: 10.7554/eLife.76584 (PMC10289812; doi:10.7554/eLife.76584)
Supplement: Figure 2—figure supplement 1—source data 1. [file elife-76584-fig2-figsupp1-data1.xlsx]

## Sheet: Sheet1
Figure S2C-time of development (%emerged pupae over time)
	GF	GF	GF	GF	GF	NC8	NC8	NC8	NC8	NC8	dOp-2	dOp-2	dOp-2	dOp-2	dOp-2	B0204	B0204	B0204	B0204	B0204	F0708	F0708	F0708	F0708	F0708
1	0	0	0	0	0	0	0	0	0	0	0	0	0	0	0	0	0	0	0	0	0	0	0	0	0
2	0	0	0	0	0	0	0	0	0	0	0	0	0	0	0	0	0	0	0	0	0	0	0	0	0
3	0	0	0	0	0	0	0	0	0	0	0	0	0	0	0	0	0	0	0	0	0	0	0	0	0
4	0	0	0	0	0	0	0	0	0	0	0	0	0	0	0	0	0	0	0	0	0	0	0	0	0
5	0	0	0	0	0	0	0	0	0	0	0	0	0	0	0	0	0	0	0	0	0	0	0	0	0
6	0	0	0	0	0	0	0	0	0	0	0	0	0	0	0	0	0	0	0	0	0	0	0	0	0
7	0	0	0	0	0	0	0	0	5.26316	0	0	0	0	0	0	0	0	0	0	0	0	0	0	0	0
8	0	0	0	0	0	12.5	5.55556	9.67742	68.4211	0	0	0	0	0	0	29.1667	26.9231	2.77778	0	3.7037	0	0	0	0	4.7619
9	0	0	0	0	0	50	27.7778	45.1613	84.2105	23.0769	8.57143	5.40541	0	5	2.63158	79.1667	65.3846	8.33333	29.0323	37.037	15.3846	8.69565	4.34783	9.67742	23.8095
10	0	0	0	0	0	81.25	77.7778	93.5484	89.4737	69.2308	31.4286	16.2162	12.5	20	28.9474	91.6667	88.4615	38.8889	67.7419	77.7778	38.4615	30.4348	43.4783	25.8065	57.1429
11	8.82353	0	0	0	3.22581	96.875	91.6667	96.7742	94.7368	94.8718	54.2857	35.1351	62.5	42.5	60.5263	100	92.3077	86.1111	87.0968	92.5926	50	60.8696	65.2174	67.7419	90.4762
12	47.0588	21.9512	23.0769	21.4286	19.3548	100	100	100	94.7368	100	77.1429	72.973	87.5	62.5	84.2105	100	96.1538	100	96.7742	100	76.9231	78.2609	82.6087	77.4194	90.4762
13	64.7059	48.7805	43.5897	42.8571	45.1613	100	100	100	100	100	91.4286	89.1892	96.875	82.5	89.4737	100	100	100	100	100	84.6154	82.6087	86.9565	100	100
14	88.2353	68.2927	64.1026	67.8571	74.1935	100	100	100	100	100	94.2857	100	100	95	92.1053	100	100	100	100	100	92.3077	100	91.3043	100	100
15	94.1176	85.3659	84.6154	85.7143	90.3226	100	100	100	100	100	100	100	100	100	94.7368	100	100	100	100	100	100	100	100	100	100
16	100	100	92.3077	89.2857	100	100	100	100	100	100	100	100	100	100	100	100	100	100	100	100	100	100	100	100	100
17	100	100	94.8718	96.4286	100	100	100	100	100	100	100	100	100	100	100	100	100	100	100	100	100	100	100	100	100
18	100	100	94.8718	100	100	100	100	100	100	100	100	100	100	100	100	100	100	100	100	100	100	100	100	100	100
19	100	100	100	100	100	100	100	100	100	100	100	100	100	100	100	100	100	100	100	100	100	100	100	100	100
20	100	100	100	100	100	100	100	100	100	100	100	100	100	100	100	100	100	100	100	100	100	100	100	100	100
FigureS2D-time of development (%emerged pupae over time)
	NC8					deltaOp					GF
1	0	0	0	0	0	0	0	0	0	0	0	0	0	0	0
2	0	0	0	0	0	0	0	0	0	0	0	0	0	0	0
3	0	0	0	0	0	0	0	0	0	0	0	0	0	0	0
4	0	0	0	0	0	0	0	0	0	0	0	0	0	0	0
5	0	0	0	0	0	0	0	0	0	0	0	0	0	0	0
6	0	0	0	0	0	0	0	0	0	0	0	0	0	0	0
7	3.44828	0	0	0	0	0	0	0	0	0	0	0	0	0	0
8	10.3448	0	0	5.71429	0	0	0	0	0	0	0	0	0	0	0
9	37.931	5.55556	0	14.2857	0	0	0	0	0	0	0	0	0	0	0
10	55.1724	11.1111	0	31.4286	17.0732	0	0	0	0	0	0	0	0	0	0
11	82.7586	27.7778	0	48.5714	46.3415	0	2.43902	0	0	2.43902	0	4.7619	13.1579	2.85714	2.5
12	93.1034	58.3333	10.5263	65.7143	65.8537	14.6341	12.1951	16.6667	15	7.31707	6.25	9.52381	21.0526	11.4286	12.5
13	100	91.6667	36.8421	88.5714	90.2439	39.0244	41.4634	38.0952	40	31.7073	25	42.8571	47.3684	28.5714	45
14	100	94.4444	63.1579	94.2857	95.122	78.0488	73.1707	71.4286	72.5	73.1707	56.25	78.5714	81.5789	62.8571	72.5
15	100	97.2222	78.9474	100	97.561	85.3659	80.4878	85.7143	80	82.9268	75	83.3333	81.5789	71.4286	80
16	100	100	89.4737	100	97.561	92.6829	85.3659	92.8571	87.5	90.2439	90.625	97.619	92.1053	82.8571	90
17	100	100	94.7368	100	97.561	100	95.122	97.619	97.5	95.122	93.75	100	97.3684	100	97.5
18	100	100	97.3684	100	100	100	100	100	100	100	96.875	100	100	100	97.5
19	100	100	100	100	100	100	100	100	100	100	100	100	100	100	100
FigureS2E-CFUs/mL HD over time
	NC8	NC8	NC8	NC8	NC8	dop1	dop1	dop1	dop1	dop1	dop2	dop2	dop2	dop2	dop2	dtRNA1	dtRNA1	dtRNA1	dtRNA1	dtRNA1	dtRNA2	dtRNA2	dtRNA2	dtRNA2	dtRNA2
0	1510000	146000	401000	1900000	947000	767000	1010000	1320000	730000	888000		2670000	710000	730000	1050000		2750000	789000	611000	600000	907000	966000	196000	868000	907000
1	4800000	44000000	200000	6110000	65000000	75000000	14600000	30200000	105000000	4210000	71000000	1600000	5110000	17100000	4540000	11000000	2800000	12800000	1640000	14400000	640000	15900000	8880000	8090000	2080000
2	130000000	230000000	190000000	170000000	1200000000	101000000	225000000	144000000	271000000	350000000	92700000	10200000	86800000	20400000	190000000	3680000	20500000	25200000	200000	35700000	16000000	4400000	151000000	16000000	9000000
3	66000000	210000000	170000000	470000000	1400000000	92000000	84000000	268000000	84000000	578000000	92000000	188000000	228000000	142000000	104000000	29800000	200000	8880000	4670000	8280000	78000000	820000	2430000	59000000	5560000
6	74000000	230000000	160000000	280000000	58000000	236000000	30000000	156000000	90000000	124000000	170000000	152000000	240000000	60000000	112000000	70000000	5600000	36200000	101000000	86800000	5800000	21200000	9000000	143000000	24800000
Figure S2G-expression of Thr-tRNA
	NC8			ΔOpr/tRNA
tRNA15	1635.28	2442	1341.35	1760.66	2096.59	1660.55
tRNA57	9099.73	8403	7056.2	7132.04	8086.22	7375.98
tRNA69	167.794	189	164.497	128.296	116.335	120.709
tRNA5	7665.42	6920	6795.13	12.2837	9.64099	24.6184
