# Supplementary material for: Intestinal GCN2 controls Drosophila systemic growth in response to Lactiplantibacillus plantarum symbiotic cues encoded by r/tRNA operons
Source: eLife. 2023 Jun 9;12:e76584. doi: 10.7554/eLife.76584 (PMC10289812; doi:10.7554/eLife.76584)
Supplement: Figure 2—source data 1. [file elife-76584-fig2-data1.xlsx]

## Sheet: Sheet1
Figure 2C-median time of development on HD-80% Valine
E05.05	E05.05	E05.05	E05.05	E05.05	F09.11	F09.11	F09.11	F09.11	F09.11	E09.20	E09.20	E09.20	E09.20	E09.20	F03.06	F03.06	F03.06	F03.06	F03.06	H04.06	H04.06	H04.06	H04.06	H04.06	D12.10	D12.10	D12.10	D12.10	D12.10	B08.06	B08.06	B08.06	B08.06	B08.06	B03.16	B03.16	B03.16	B03.16	B03.16	B04.16	B04.16	B04.16	B04.16	B04.16	B05.11	B05.11	B05.11	B05.11	B05.11
12.7	13.9	13.6	12.4	14.8	0	0	0	0	0	11	11	9	12	14	13.25	13.75	13.92	13.5	13.25	15.3571	13.6667	14	14.6875	15.75	14.125	16.083	15.75	15.5	15.5	14.3	15.3	14.5	14.3	16.7	10.5	12.2	13.3	13.9	13.1	10.6667	12.3571	11	11.8333	11	11.5	15	14.3	13.7	13.1
Figure 2D-CFUs/mL of HD
	B12.11	B12.11	B12.11	C08.20	C08.20	C08.20	C09.09	C09.09	C09.09	D12.09	D12.09	D12.09	D12.16	D12.16	D12.16	F07.08	F07.08	F07.08	B02.04	B02.04	B02.04	B08.06	B08.06	B08.06	F09.11	F09.11	F09.11	H04.06	H04.06	H04.06
t0	2830000	2830000	3180000	2440000	2130000	2480000	2210000	1820000	2400000	2250000	2870000	2290000	2600000	1400000	1860000	3020000	2750000	3100000	2290000	2170000	2640000	2050000	2170000	2170000	2480000	2560000	2090000	2900000	2090000	2020000
t1	28800000	45400000	32000000	50000000	36800000	22400000	12600000	31200000	49300000	24000000	20000000	14000000	18400000	36200000	42100000	5400000	27000000	29200000	60000000	43300000	40800000	300000	140000	100000	620000	20000	140000	560000	340000	560000
t2	142000000	186000000	202000000	287000000	360000000	360000000	314000000	233000000	151000000	264000000	236000000	252000000	209000000	231000000	199000000	90700000	32200000	147000000	300000000	360000000	291000000	200000	400000	100000	20000	780000		300000	2890000	680000
t3	489000000	355000000	513000000	322000000	1140000000	750000000	414000000	304000000	456000000	678000000	476000000	889000000	552000000	460000000	356000000	342000000	362000000	292000000	302000000	1050000000	756000000	580000	1680000	2180000	24800000	9660000	1140000	15900000	26700000	7000000
t6	302000000	228000000	411000000	378000000	228000000	256000000	302000000	250000000	511000000	388000000	355000000	375000000	250000000	467000000	690000000	394000000	444000000	589000000	244000000	128000000	276000000	420000000	280000000	20000000	2400000	6600000		440000000	540000000	71100000
Figure 2E-CFUs/larva
B12.11	B12.11	B12.11	B12.11	B12.11	C08.20	C08.20	C08.20	C08.20	C08.20	C09.09	C09.09	C09.09	C09.09	C09.09	D12.09	D12.09	D12.09	D12.09	D12.09	D12.16	D12.16	D12.16	D12.16	D12.16	F07.08	F07.08	F07.08	F07.08	F07.08	B02.04	B02.04	B02.04	B02.04	B02.04
225000	438000	581000	205000	167000	76900	244000	110000	77800	151000	101000	295000	7600	174000	37800	349000	267000	107000	209000	267000	372000	34400	17600	155000	103000	132000	22400	271000	80900	298000	120000	31200	136000	411000	78900
Figure 2F-time of development on HD -60%Val
	GF	GF	GF	GF	GF	B2.4	B2.4	B2.4	B2.4	B2.4	B12.11	B12.11	B12.11	B12.11	B12.11	C08.20	C08.20	C08.20	C08.20	C08.20	C9.9	C9.9	C9.9	C9.9	C9.9	D12.9	D12.9	D12.9	D12.9	D12.9	D12.16	D12.16	D12.16	D12.16	D12.16	F7.8	F7.8	F7.8	F7.8	F7.8
1	0	0	0	0	0	0	0	0	0	0	0	0	0	0	0	0	0	0	0	0	0	0	0	0	0	0	0	0	0	0	0	0	0	0	0	0	0	0	0	0
2	0	0	0	0	0	0	0	0	0	0	0	0	0	0	0	0	0	0	0	0	0	0	0	0	0	0	0	0	0	0	0	0	0	0	0	0	0	0	0	0
3	0	0	0	0	0	0	0	0	0	0	0	0	0	0	0	0	0	0	0	0	0	0	0	0	0	0	0	0	0	0	0	0	0	0	0	0	0	0	0	0
4	0	0	0	0	0	0	0	0	0	0	0	0	0	0	0	0	0	0	0	0	0	0	0	0	0	0	0	0	0	0	0	0	0	0	0	0	0	0	0	0
5	0	0	0	0	0	0	0	0	0	0	0	0	0	0	0	0	0	0	0	0	0	0	0	0	0	0	0	0	0	0	0	0	0	0	0	0	0	0	0	0
6	0	0	0	0	0	0	0	0	0	0	0	0	0	0	0	0	0	0	0	0	0	0	0	0	0	0	0	0	0	0	0	0	0	0	0	0	0	0	0	0
7	0	0	0	0	0	0	0	0	0	0	0	3.0303	16	0	7.89474	0	0	0	4.34783	0	0	0	0	0	0	0	0	0	0	0	0	0	0	0	0	0	0	0	0	0
8	0	0	0	0	0	36.6667	60.7143	4.34783	10.5263	10.2564	36.1111	30.303	40	4.65116	31.5789	10	9.09091	10.7143	34.7826	17.2414	10	0	0	0	0	0	3.33333	0	0	2.85714	0	0	0	3.44828	0	0	0	0	3.44828	6.06061
9	0	0	0	0	0	80	82.1429	28.2609	42.1053	35.8974	52.7778	60.6061	80	32.5581	65.7895	60	36.3636	42.8571	78.2609	48.2759	43.3333	16.2162	30.303	15.3846	16.6667	5.71429	23.3333	11.1111	9.09091	28.5714	21.6216	8.82353	2.94118	13.7931	6.45161	6.06061	3.0303	3.22581	10.3448	18.1818
10	5.71429	0	0	0	2.63158	96.6667	96.4286	65.2174	78.9474	79.4872	80.5556	87.8788	88	60.4651	81.5789	80	60.6061	75	86.9565	75.8621	66.6667	48.6486	66.6667	51.2821	47.2222	37.1429	60	44.4444	33.3333	68.5714	72.973	58.8235	44.1176	62.069	64.5161	24.2424	33.3333	29.0323	37.931	54.5455
11	37.1429	5.88235	20.4545	12.1212	23.6842	100	100	91.3043	94.7368	97.4359	94.4444	90.9091	96	88.3721	86.8421	93.3333	90.9091	85.7143	95.6522	86.2069	86.6667	86.4865	84.8485	74.359	69.4444	60	66.6667	72.2222	66.6667	80	97.2973	76.4706	76.4706	79.3103	80.6452	60.6061	51.5152	67.7419	65.5172	75.7576
12	57.1429	26.4706	45.4545	33.3333	42.1053	100	100	100	100	100	100	93.9394	96	95.3488	92.1053	100	100	92.8571	100	93.1034	96.6667	94.5946	93.9394	87.1795	91.6667	85.7143	83.3333	97.2222	81.8182	94.2857	100	100	91.1765	96.5517	93.5484	78.7879	66.6667	83.871	72.4138	90.9091
13	82.8571	44.1176	77.2727	57.5758	65.7895	100	100	100	100	100	100	96.9697	100	100	94.7368	100	100	100	100	100	100	100	96.9697	94.8718	94.4444	94.2857	93.3333	97.2222	87.8788	100	100	100	97.0588	100	100	90.9091	81.8182	96.7742	96.5517	96.9697
14	91.4286	79.4118	90.9091	81.8182	86.8421	100	100	100	100	100	100	96.9697	100	100	100	100	100	100	100	100	100	100	100	94.8718	97.2222	97.1429	96.6667	100	100	100	100	100	97.0588	100	100	93.9394	90.9091	96.7742	100	100
15	97.1429	94.1176	95.4545	100	97.3684	100	100	100	100	100	100	100	100	100	100	100	100	100	100	100	100	100	100	97.4359	100	97.1429	100	100	100	100	100	100	100	100	100	96.9697	96.9697	100	100	100
16	100	100	100	100	100	100	100	100	100	100	100	100	100	100	100	100	100	100	100	100	100	100	100	97.4359	100	100	100	100	100	100	100	100	100	100	100	96.9697	96.9697	100	100	100
17	100	100	100	100	100	100	100	100	100	100	100	100	100	100	100	100	100	100	100	100	100	100	100	100	100	100	100	100	100	100	100	100	100	100	100	100	100	100	100	100
18	100	100	100	100	100	100	100	100	100	100	100	100	100	100	100	100	100	100	100	100	100	100	100	100	100	100	100	100	100	100	100	100	100	100	100	100	100	100	100	100
19	100	100	100	100	100	100	100	100	100	100	100	100	100	100	100	100	100	100	100	100	100	100	100	100	100	100	100	100	100	100	100	100	100	100	100	100	100	100	100	100
[truncated: 150 more columns]
