# Supplementary material for: Intestinal GCN2 controls Drosophila systemic growth in response to Lactiplantibacillus plantarum symbiotic cues encoded by r/tRNA operons
Source: eLife. 2023 Jun 9;12:e76584. doi: 10.7554/eLife.76584 (PMC10289812; doi:10.7554/eLife.76584)
Supplement: Figure 3—source data 1. [file elife-76584-fig3-data1.xlsx]

## Sheet: Sheet1
Figure 3B-RNA from vesicles, normalized with Cq from uninjected MRS
total cells			purified vesicles, untreated			purified vesicles, RNAse-treated
16S	23S	Thr-tRNA	16S	23S	Thr-tRNA	16S	23S	Thr-tRNA
5.02531e+06	3.82699e+06	163.02	13.13	39.95	24.59	1.04	3.73	9.45
4.20627e+06	4.98358e+06	109.95	13.65	45.48	26.08	1.03	3.66	7.58
