# Supplementary material for: Intestinal GCN2 controls Drosophila systemic growth in response to Lactiplantibacillus plantarum symbiotic cues encoded by r/tRNA operons
Source: eLife. 2023 Jun 9;12:e76584. doi: 10.7554/eLife.76584 (PMC10289812; doi:10.7554/eLife.76584)
Supplement: Figure 4—figure supplement 1—source data 1. [file elife-76584-fig4-figsupp1-data1.xlsx]

## Sheet: Sheet1
FigS3C-4EB-BP expression
GF_V40					Lp_V40
0.470709	1.54823	0.691192	3.33494	0.534692	4.87848	3.43197	3.90012	5.94283	1.73098
