# Supplementary material for: Intestinal GCN2 controls Drosophila systemic growth in response to Lactiplantibacillus plantarum symbiotic cues encoded by r/tRNA operons
Source: eLife. 2023 Jun 9;12:e76584. doi: 10.7554/eLife.76584 (PMC10289812; doi:10.7554/eLife.76584)
Supplement: Figure 4—source data 1. [file elife-76584-fig4-data1.xlsx]

## Sheet: Sheet1
Figure 4B-%positive cells/anterior midgut
GF Val40	Lp Val 40	GF Val100	Lp Val100
0	24.5333	0.210084	25.6131
13.1519	35.1706	0	3.37079
16.3488	26.3451	0	33.6788
0	32.5967	0	34.2105
8.5213	31.3059	0	16.0752
1.23839	77.0213	0	17.4603
0	55.5288	0	19.0909
0.263158	9.06736	0	33.8374
1.24688		0
0		0
		0
		0
Figure 4D-%positive cells/anterior midgut
control-GF	control-Lp	GCN2-GF	GCN2-Lp
0.357143	45.7895	0	0
0	12.2642	0	0
0	61.9597	0	0
	8.64198	0	0
0	67.2131	0	0
2.97297	50.4386	0	0
0	57.2438	0	0
0	61.6052	0.326797	0
0	54.2169	0	0
0	66.0494	0.662252	0
0.810811			0
Figure 4F-%positive cells/anterior midgut
control-GF	control-Lp	GCN2-GF	GCN2-Lp
0	65.7143	0	0
0	34.9673	0	1.31148
0	25.4601	0	0
1.74927	3.78007	0	0
0	0	0	0
	51.0448	0	0
	25.1295	0	0.328947
	64.3791	0	0
	73	0	0
	0	0	0
	37.0466	0
	53.2609	0
