# Supplementary material for: Intestinal GCN2 controls Drosophila systemic growth in response to Lactiplantibacillus plantarum symbiotic cues encoded by r/tRNA operons
Source: eLife. 2023 Jun 9;12:e76584. doi: 10.7554/eLife.76584 (PMC10289812; doi:10.7554/eLife.76584)
Supplement: Figure 5—figure supplement 1—source data 1. [file elife-76584-fig5-figsupp1-data1.xlsx]

## Sheet: Sheet1
FigS4B-%positive cell/anterior midgut
GF	Lp:Tnr/tRNA	Lp:Tncontrol
20.6989	1.45349	36.0656
8.159	67.132	7.67123
11.4706	23.7435	30.7856
26.5625	15.3392	21.7993
	16.7123	63.142
7.18391	29.6584	3.93443
3.73333	11.4754	27.49
2.33918	20.2703	26.3158
13.8191	33.8882	56.4767
10.6061	31.0294	32.0113
9.96785		51.8797
14.5859
FigS4D-%positive cell/anterior midgut
GF	Lp:Tnr/tRNA	Lp:Tncontrol
0	0	63.4021
0	0	73.6607
0	3.51351	90.5775
0	0.818713	29.6954
	24.1641	76.9231
1.75719	#DIV/0!	27.1591
0	23.1988	57.7236
0	0	60.3034
0.877193	3.16395	46.9438
0	4.95553	58.5202
0	52.8497	69.1412
0		55.627
FigS4F-%positive cell/anterior midgut
GF	Lp:Tnr/tRNA	Lp:Tncontrol
0	7.23514	12.5
0.549451	0.249377	3.18907
1.91781	0.358423	9.04159
15.4386	2.22841	24.4755
0.719424	1.86047	1.49254
16.5017	3.94191	5.64516
	0	18.2039
FigS4G-%positive cell/anterior midgut
GF	Ec25	Ec125	y25	y125	Lp
5.23256	0.321543	7.05882	0.58651	2.14724	89.6175
1.4881	0	3.26797	0	13.0952	21.2245
0	3.2	10.3535	7.5	21.4984	89.6277
0.854701	3.75	4.50928	15.655	4.88599	49.848
2.65957	3.48837	5.92885	12.1827	#DIV/0!	70.5426
1.85185	1.21457	3.1746	0.554017	11.8012	68.4783
0	0.392157	12.7517	6.6482	43.1373	59.1133
0	0.56338	4.33437	4.29043	11.0169	68.8047
	5.01475	9.65732		4.70219
	1.07817
