# Supplementary material for: Intestinal GCN2 controls Drosophila systemic growth in response to Lactiplantibacillus plantarum symbiotic cues encoded by r/tRNA operons
Source: eLife. 2023 Jun 9;12:e76584. doi: 10.7554/eLife.76584 (PMC10289812; doi:10.7554/eLife.76584)
Supplement: Figure 5—source data 1. [file elife-76584-fig5-data1.xlsx]

## Sheet: Sheet1
Figure 5B-%positive cells/anterior midgut
GF	Δopr/tRNA	WT
0	63.6364	44.3396
0	56.0784	33.6617
0	0.480769	44.9367
0	28.2192	47.3684
2.92887	1.72414	33.4507
0	19.7026	24.9211
2.15054	0	37.2168
0	46.9595	31.7254
0	60.7843	71.1429
0	57.7869	57.4307
0.314465	1.70213	76.1062
0.411523	5.64103	42.7536
0	23.0088	34.8449
	10.7527	27.6657
		52.2167
Figure 5D-%positive cells/anterior midgut
GF	Δopr/tRNA	WT
0	15.0171	40.9574
0	16.6667	51.3208
0.347222	2.78884	0
0.369004	0	35.8663
0	10.559	16.0326
0.2457	0	4.20792
0	18.2561	5.23416
0	0	34.7945
0	9.09091	6.03015
0.268817	0	0.576923
0	0	0
0	0	17.0543
0	6.45161	36
0	0.325733	28.2297
0	0	6
0	15.3061
Figure 5F-%positive cells/anterior midgut
GF	Ec25	Ec125
5.23256	0.321543	7.05882
1.4881	0	3.26797
0	3.2	10.3535
0.854701	3.75	4.50928
2.65957	3.48837	5.92885
1.85185	1.21457	3.1746
0	0.392157	12.7517
0	0.56338	4.33437
	5.01475	9.65732
	1.07817
