# Supplementary material for: Intestinal GCN2 controls Drosophila systemic growth in response to Lactiplantibacillus plantarum symbiotic cues encoded by r/tRNA operons
Source: eLife. 2023 Jun 9;12:e76584. doi: 10.7554/eLife.76584 (PMC10289812; doi:10.7554/eLife.76584)
Supplement: Figure 6—figure supplement 1—source data 1. [file elife-76584-fig6-figsupp1-data1.xlsx]

## Sheet: Sheet1
Figure S5A-time of development (%emerged pupae over time)
Days	>mCherryRNAi_GF	>mCherryRNAi_GF	>mCherryRNAi_GF	>mCherryRNAi_GF	>mCherryRNAi_GF	>mCherryRNAi_Lp	>mCherryRNAi_Lp	>mCherryRNAi_Lp	>mCherryRNAi_Lp	>mCherryRNAi_Lp	>GCN2RNAi_GF	>GCN2RNAi_GF	>GCN2RNAi_GF	>GCN2RNAi_GF	>GCN2RNAi_GF	>GCN2RNAi_Lp	>GCN2RNAi_Lp	>GCN2RNAi_Lp	>GCN2RNAi_Lp	>GCN2RNAi_Lp
1	0	0	0	0	0	0	0	0	0	0	0	0	0	0	0	0	0	0	0	0
2	0	0	0	0	0	0	0	0	0	0	0	0	0	0	0	0	0	0	0	0
3	0	0	0	0	0	0	0	0	0	0	0	0	0	0	0	0	0	0	0	0
4	0	0	0	0	0	0	0	0	0	0	0	0	0	0	0	0	0	0	0	0
5	0	0	0	0	0	0	0	0	0	0	0	0	0	0	0	0	0	0	0	0
6	0	0	0	0	0	0	0	0	0	0	0	0	0	0	0	0	0	0	0	0
7	0	0	0	0	0	0	0	0	0	0	0	0	0	0	0	0	0	0	0	0
8	0	0	0	0	0	5	0	0	0	4.8	0	0	0	0	0	0	0	0	0	0
9	0	0	0	0	0	37.5	0	0	7.3	28.6	0	0	0	0	0	3.125	5.556	3.03	2.778	0
10	0	0	0	0	1.6129	72.5	24.6	11.3	43.6	73.8	0	0	0	0	0	6.25	11.111	12.121	5.556	6.061
11	7.54717	3.33333	7.93651	5.17241	12.9032	92.5	66.7	53.2	74.5	92.9	0	0	0	0	0	6.25	25	33.333	8.333	21.212
12	66.0377	36.6667	50.7937	41.3793	56.4516	95	93	87.1	94.5	97.6	0	0	0	0	0	21.875	47.222	60.606	16.667	33.333
13	86.7925	80	88.8889	87.931	85.4839	100	94.7	96.8	100	100	7.14286	9.7561	0	0	6.06061	56.25	61.111	84.848	33.333	57.576
14	96.2264	90	96.8254	94.8276	90.3226	100	96.5	100	100	100	14.2857	26.8293	12.9032	13.0435	15.1515	62.5	75	96.97	50	75.758
15	96.2264	96.6667	100	96.5517	100	100	96.5	100	100	100	39.2857	46.3415	32.2581	26.087	33.3333	75	86.111	96.97	61.111	81.818
16	98.1132	98.3333	100	96.5517	100	100	100	100	100	100	67.8571	78.0488	61.2903	47.8261	48.4848	84.375	97.222	100	86.111	81.818
17	100	100	100	98.2759	100	100	100	100	100	100	85.7143	97.561	83.871	78.2609	75.7576	90.625	97.222	100	94.444	96.97
18	100	100	100	100	100	100	100	100	100	100	100	100	100	100	100	100	100	100	100	100
19	100	100	100	100	100	100	100	100	100	100	100	100	100	100	100	100	100	100	100	100
20	100	100	100	100	100	100	100	100	100	100	100	100	100	100	100	100	100	100	100	100
21	100	100	100	100	100	100	100	100	100	100	100	100	100	100	100	100	100	100	100	100
22	100	100	100	100	100	100	100	100	100	100	100	100	100	100	100	100	100	100	100	100
23	100	100	100	100	100	100	100	100	100	100	100	100	100	100	100	100	100	100	100	100
Figure S5B-time of development (%emerged pupae over time)
	mCherry_GF	mCherry_GF	mCherry_GF	mCherry_GF	mCherry_GF	mCherry_Lp	mCherry_Lp	mCherry_Lp	mCherry_Lp	mCherry_Lp	GCN2_GF	GCN2_GF	GCN2_GF	GCN2_GF	GCN2_GF	GCN2_Lp	GCN2_Lp	GCN2_Lp	GCN2_Lp	GCN2_Lp
1	0	0	0	0	0	0	0	0	0	0	0	0	0	0	0	0	0	0,0000000*	0	0
2	0	0	0	0	0	0	0	0	0	0	0	0	0	0	0	0	0	0,0000000*	0	0
3	0	0	0	0	0	0	0	0	0	0	0	0	0	0	0	0	0	0,0000000*	0	0
4	0	0	0	0	0	0	0	0	0	0	0	0	0	0	0	0	0	0,0000000*	0	0
5	0	0	0	0	0	0	0	0	0	0	0	0	0	0	0	0	0	0,0000000*	0	0
6	0	0	0	0	0	0	0	0	0	0	0	0	0	0	0	0	0	5,8823529*	0	0
7	0	0	0	0	0	0	0	0	0	0	0	0	0	0	0	0	0	58,8235294*	0	3.44828
8	0	0	0	0	0	0	3.125	2.77778	5.71429	5.71429	0	0	0	0	0	11.5385	10.7143	82,3529412*	7.14286	27.5862
9	0	0	0	0	0	8.33333	25	22.2222	31.4286	14.2857	0	0	0	0	0	19.2308	28.5714	82,3529412*	28.5714	48.2759
10	0	0	0	0	0	52.7778	65.625	69.4444	71.4286	60	0	0	0	0	0	23.0769	46.4286	88,2352941*	57.1429	58.6207
11	16.6667	0	2.38095	0	2.32558	91.6667	90.625	97.2222	85.7143	82.8571	0	0	4.16667	0	0	34.6154	57.1429	88,2352941*	71.4286	75.8621
12	64.5833	20.4545	14.2857	13.1579	6.97674	97.2222	100	100	97.1429	91.4286	0	0	4.16667	0	0	50	71.4286	94,1176471*	82.1429	79.3103
13	83.3333	45.4545	61.9048	47.3684	41.8605	100	100	100	100	94.2857	4.34783	4.16667	8.33333	3.84615	0	73.0769	78.5714	100,0000000*	92.8571	82.7586
14	93.75	72.7273	80.9524	76.3158	76.7442	100	100	100	100	100	21.7391	8.33333	33.3333	19.2308	0	88.4615	89.2857	100,0000000*	96.4286	86.2069
15	95.8333	95.4545	92.8571	97.3684	95.3488	100	100	100	100	100	52.1739	16.6667	45.8333	26.9231	0	100	92.8571	100,0000000*	100	86.2069
16	97.9167	95.4545	92.8571	100	97.6744	100	100	100	100	100	60.8696	33.3333	58.3333	46.1538	12.5	100	100	100,0000000*	100	93.1034
17	100	97.7273	95.2381	100	97.6744	100	100	100	100	100	69.5652	45.8333	70.8333	57.6923	25	100	100	100,0000000*	100	96.5517
18	100	100	97.619	100	100	100	100	100	100	100	82.6087	45.8333	83.3333	80.7692	66.6667	100	100	100,0000000*	100	100
19	100	100	100	100	100	100	100	100	100	100	86.9565	62.5	100	84.6154	75	100	100	100,0000000*	100	100
20	100	100	100	100	100	100	100	100	100	100	95.6522	83.3333	100	88.4615	91.6667	100	100	100,0000000*	100	100
21	100	100	100	100	100	100	100	100	100	100	95.6522	100	100	96.1538	100	100	100	100,0000000*	100	100
22	100	100	100	100	100	100	100	100	100	100	100	100	100	100	100	100	100	100,0000000*	100	100
23	100	100	100	100	100	100	100	100	100	100	100	100	100	100	100	100	100	100,0000000*	100	100
Figure S5C-expression of GCN2
Mex>mCherryRNAi	Mex>GCN2RNAi
0.00764028	0.00268999
0.0138721	0.00292836
0.0120881	0.00424843
0.0145464	0.00417091
Figure S5D-expression of GCN2
Mex>mCherry	Mex>GCN2RNAi-35355	Mex>GCN2RNAi-67215
0.00200761	0.00177277	0.00144564
0.00336281	0.00125775	0.00262925
0.00216725	0.00219267	0.00151443
0.00298999	0.00271962	0.00176016
0.00281464	0.0018214	0.00146194
Figure S5E-CFUs/larva
Mex>mCherryRNAi	Mex>mCherryRNAi	Mex>mCherryRNAi	Mex>mCherryRNAi	Mex>mCherryRNAi	Mex>GCN2RNAi	Mex>GCN2RNAi	Mex>GCN2RNAi	Mex>GCN2RNAi	Mex>GCN2RNAi
597000	640000	504000	740000	530000	1620000	1530000	1330000	1460000	1210000
Figure S5F-time of development (%emerged pupae over time)
mCherry-GF	mCherry-GF	mCherry-GF	mCherry-GF	mCherry-GF	mCherry-Lp	mCherry-Lp	mCherry-Lp	mCherry-Lp	mCherry-Lp	GCN2-GF	GCN2-GF	GCN2-GF	GCN2-GF	GCN2-GF	GCN2-Lp	GCN2-Lp	GCN2-Lp	GCN2-Lp	GCN2-Lp																										AMPK-Lp	AMPK-Lp	AMPK-Lp	AMPK-Lp	AMPK-Lp
0	0	0	0	0	0	0	0	0	0	0	0	0	0	0	0	0	0	0	0
0	0	0	0	0	0	0	0	0	0	0	0	0	0	0	0	0	0	0	0
0	0	0	0	0	0	0	0	0	0	0	0	0	0	0	0	0	0	0	0
0	0	0	0	0	0	0	0	0	0	0	0	0	0	0	0	0	0	0	0
0	0	0	0	0	0	0	0	0	0	0	0	0	0	0	0	0	0	0	0
0	0	0	0	0	0	0	0	0	0	0	0	0	0	0	0	0	0	0	0
0	0	0	0	0	0	0	0	0	0	0	0	0	0	0	0	0	0	5.88235	0
0	0	0	0	0	6.66667	19.2308	0	0	0	0	0	0	0	0	0	0	0	64.7059	0
0	0	0	0	0	36.6667	42.3077	21.0526	35.2941	15.1515	0	0	0	0	0	13.3333	19.3548	0	94.1176	8.82353
0	0	0	0	0	73.3333	84.6154	73.6842	82.3529	72.7273	0	0	0	0	0	73.3333	61.2903	58.8235	100	38.2353
0	0	0	0	0	96.6667	100	94.7368	94.1176	90.9091	0	0	0	0	0	96.6667	93.5484	79.4118	100	70.5882
3.125	0	0	0	3.33333	100	100	100	97.0588	100	0	2.5	0	0	0	100	100	88.2353	100	97.0588
12.5	12.5	9.67742	9.375	10	100	100	100	100	100	0	17.5	0	3.0303	0	100	100	100	100	100
40.625	40.625	32.2581	46.875	33.3333	100	100	100	100	100	22.5806	50	10	33.3333	22.5806	100	100	100	100	100
87.5	68.75	64.5161	81.25	70	100	100	100	100	100	67.7419	90	56.6667	72.7273	64.5161	100	100	100	100	100
93.75	90.625	74.1935	90.625	93.3333	100	100	100	100	100	90.3226	100	76.6667	87.8788	93.5484	100	100	100	100	100
93.75	96.875	90.3226	93.75	93.3333	100	100	100	100	100	96.7742	100	93.3333	96.9697	100	100	100	100	100	100
100	96.875	100	100	96.6667	100	100	100	100	100	100	100	100	96.9697	100	100	100	100	100	100
100	100	100	100	100	100	100	100	100	100	100	100	100	100	100	100	100	100	100	100
100	100	100	100	100	100	100	100	100	100	100	100	100	100	100	100	100	100	100	100
100	100	100	100	100	100	100	100	100	100	100	100	100	100	100	100	100	100	100	100
100	100	100	100	100	100	100	100	100	100	100	100	100	100	100	100	100	100	100	100
Figure S5G-time of development (%emerged pupae over time)
	mCherry-GF	mCherry-GF	mCherry-GF	mCherry-GF	mCherry-GF	mCherry-Lp	mCherry-Lp	mCherry-Lp	mCherry-Lp	mCherry-Lp	20210126_DT_C564TOR1V40 GF	20210126_DT_C564TOR1V40 GF	20210126_DT_C564TOR1V40 GF	20210126_DT_C564TOR1V40 GF	20210126_DT_C564TOR1V40 GF	TOR1-Lp	TOR1-Lp	TOR1-Lp	TOR1-Lp	TOR1-Lp
1	0	0	0	0	0	0	0	0	0	0	0	0	0	0	0	0	0	0	0	0
2	0	0	0	0	0	0	0	0	0	0	0	0	0	0	0	0	0	0	0	0
3	0	0	0	0	0	0	0	0	0	0	0	0	0	0	0	0	0	0	0	0
4	0	0	0	0	0	0	0	0	0	0	0	0	0	0	0	0	0	0	0	0
5	0	0	0	0	0	0	0	0	0	0	0	0	0	0	0	0	0	0	0	0
6	0	0	0	0	0	0	0	0	0	0	0	0	0	0	0	0	0	0	0	0
7	0	0	0	0	0	6.89655	0	0	6.45161	0	0	0	0	0	0	11.7647	19.4444	9.375	34.7826	7.14286
8	0	0	0	0	0	41.3793	11.7647	34.2105	51.6129	28.2051	0	0	0	0	0	47.0588	38.8889	43.75	78.2609	26.1905
9	0	0	0	0	0	72.4138	88.2353	73.6842	83.871	74.359	0	0	0	0	0	76.4706	55.5556	62.5	100	50
10	0	0	0	0	0	96.5517	100	94.7368	96.7742	89.7436	0	0	0	0	0	97.0588	83.3333	84.375	100	76.1905
11	2.85714	0	0	0	2.63158	100	100	100	100	97.4359	0	0	0	0	0	100	88.8889	93.75	100	97.619
12	8.57143	12	34.6154	25	13.1579	100	100	100	100	100	0	0	0	0	0	100	94.4444	96.875	100	97.619
13	40	36	73.0769	46.4286	44.7368	100	100	100	100	100	0	0	0	0	0	100	100	100	100	100
14	65.7143	84	88.4615	71.4286	76.3158	100	100	100	100	100	0	0	0	0	0	100	100	100	100	100
15	85.7143	88	92.3077	85.7143	89.4737	100	100	100	100	100	0	0	0	0	0	100	100	100	100	100
16	94.2857	88	100	96.4286	100	100	100	100	100	100	0	0	0	0	0	100	100	100	100	100
17	97.1429	96	100	100	100	100	100	100	100	100	0	0	0	0	0	100	100	100	100	100
18	100	100	100	100	100	100	100	100	100	100	0	0	0	0	0	100	100	100	100	100
19	100	100	100	100	100	100	100	100	100	100	0	0	0	0	0	100	100	100	100	100
20	100	100	100	100	100	100	100	100	100	100	0	0	0	0	0	100	100	100	100	100
21	100	100	100	100	100	100	100	100	100	100	0	0	0	0	0	100	100	100	100	100
22	100	100	100	100	100	100	100	100	100	100	0	0	0	0	0	100	100	100	100	100
23	100	100	100	100	100	100	100	100	100	100	0	0	0	0	0	100	100	100	100	100
24	100	100	100	100	100	100	100	100	100	100	0	0	0	0	0	100	100	100	100	100
Figure S5H-time of development (%emerged pupae over time)
mCherry-GF	mCherry-GF	mCherry-GF	mCherry-GF	mCherry-GF	mCherry-Lp	mCherry-Lp	mCherry-Lp	mCherry-Lp	mCherry-Lp	TOR1-GF	TOR1-GF	TOR1-GF	TOR1-GF	TOR1-GF	TOR1-Lp	TOR1-Lp	TOR1-Lp	TOR1-Lp	TOR1-Lp
0	0	0	0	0	0	0	0	0	0	0	0	0	0	0	0	0	0	0	0
0	0	0	0	0	0	0	0	0	0	0	0	0	0	0	0	0	0	0	0
0	0	0	0	0	0	0	0	0	0	0	0	0	0	0	0	0	0	0	0
0	0	0	0	0	0	0	0	0	0	0	0	0	0	0	0	0	0	0	0
0	0	0	0	0	0	0	0	0	0	0	0	0	0	0	0	0	0	0	0
0	0	0	0	0	0	0	0	0	0	0	0	0	0	0	0	0	0	0	0
0	0	0	0	0	0	0	0	3.44828	0	0	0	0	0	0	0	0	0	0	0
0	0	0	0	0	0	2.7027	5.88235	20.6897	0	0	0	0	0	0	0	19.2308	6.45161	9.67742	6.06061
0	0	0	0	0	8.10811	32.4324	32.3529	48.2759	25.641	0	0	0	0	0	17.6471	50	16.129	22.5806	30.303
0	0	0	0	0	70.2703	81.0811	82.3529	86.2069	66.6667	0	0	0	0	0	61.7647	76.9231	54.8387	64.5161	66.6667
10.5263	2.94118	8.10811	0	0	100	100	94.1176	96.5517	94.8718	0	0	0	0	0	91.1765	96.1538	93.5484	93.5484	84.8485
47.3684	20.5882	24.3243	18.4211	20.7547	100	100	100	96.5517	97.4359	0	0	0	0	0	97.0588	100	100	100	93.9394
78.9474	61.7647	62.1622	60.5263	60.3774	100	100	100	100	100	0	0	0	0	0	100	100	100	100	96.9697
100	88.2353	83.7838	89.4737	84.9057	100	100	100	100	100	0	0	0	0	0	100	100	100	100	100
100	97.0588	86.4865	94.7368	96.2264	100	100	100	100	100	0	0	0	0	0	100	100	100	100	100
100	100	94.5946	97.3684	100	100	100	100	100	100	0	10	8	4	4	100	100	100	100	100
100	100	97.2973	97.3684	100	100	100	100	100	100	12	24	12	12	4	100	100	100	100	100
100	100	100	100	100	100	100	100	100	100	28	29	16	16	17	100	100	100	100	100
100	100	100	100	100	100	100	100	100	100	52	48	16	24	38	100	100	100	100	100
100	100	100	100	100	100	100	100	100	100	60	52	24	48	46	100	100	100	100	100
100	100	100	100	100	100	100	100	100	100	80	71	36	72	58	100	100	100	100	100
100	100	100	100	100	100	100	100	100	100	84	86	68	80	67	100	100	100	100	100
100	100	100	100	100	100	100	100	100	100	96	100	80	100	79	100	100	100	100	100
100	100	100	100	100	100	100	100	100	100	100	100	100	100	100	100	100	100	100	100
Figure S5I-time of development (%emerged pupae over time)
	9558_NC8					9558_GF					9559_NC8					9559_GF					yw-NC8					yw_GF
1	0	0	0	0		0	0	0	0		0	0	0	0	0	0	0	0	0	0	0	0	0	0	0	0	0	0	0	0
2	0	0	0	0		0	0	0	0		0	0	0	0	0	0	0	0	0	0	0	0	0	0	0	0	0	0	0	0
3	0	0	0	0		0	0	0	0		0	0	0	0	0	0	0	0	0	0	0	0	0	0	0	0	0	0	0	0
4	0	0	0	0		0	0	0	0		0	0	0	0	0	0	0	0	0	0	0	0	0	0	0	0	0	0	0	0
5	0	0	0	0		0	0	0	0		0	0	0	0	0	0	0	0	0	0	0	0	0	0	0	0	0	0	0	0
6	0	0	0	0		0	0	0	0		0	0	0	0	0	0	0	0	0	0	0	0	0	0	0	0	0	0	0	0
7	45	0	28	3.33333		0	0	0	0		16.6667	0	0	0	4.7619	0	0	0	0	0	0	0	0	0	0	0	0	0	0	0
8	55	17.6471	48	20		0	0	0	0		66.6667	0	14.8148	5.40541	33.3333	0	0	0	0	0	6.81818	0	2.43902	2.43902	5.12821	0	0	0	0	0
9	65	47.0588	64	46.6667		0	0	0	0		83.3333	14.2857	55.5556	21.6216	57.1429	0	0	0	0	0	6.81818	4.87805	12.1951	14.6341	12.8205	0	0	0	0	0
10	70	58.8235	84	56.6667		0	0	0	0		88.8889	40.4762	77.7778	45.9459	90.4762	0	0	0	0	0	25	19.5122	31.7073	24.3902	33.3333	0	0	0	0	0
11	75	76.4706	84	73.3333		0	3.125	8.33333	0		94.4444	69.0476	85.1852	75.6757	95.2381	0	0	0	0	0	43.1818	39.0244	39.0244	48.7805	38.4615	2.27273	2.5	4.87805	0	0
12	75	85.2941	84	80		0	6.25	13.8889	0		94.4444	76.1905	85.1852	78.3784	95.2381	0	0	0	0	0	47.7273	46.3415	43.9024	56.0976	46.1538	4.54545	7.5	4.87805	0	0
13	75	91.1765	96	83.3333		28.5714	25	33.3333	17.2414		100	95.2381	88.8889	86.4865	100	0	0	0	0	0	77.2727	78.0488	73.1707	73.1707	74.359	18.1818	27.5	17.0732	9.52381	4.87805
14	85	97.0588	96	83.3333		60.7143	68.75	69.4444	51.7241		100	100	92.5926	94.5946	100	0	0	0	0	0	88.6364	92.6829	90.2439	90.2439	79.4872	47.7273	60	65.8537	30.9524	24.3902
15	95	100	100	86.6667		78.5714	81.25	88.8889	62.069		100	100	100	100	100	0	0	0	0	0	93.1818	92.6829	95.122	92.6829	87.1795	65.9091	80	80.4878	61.9048	53.6585
16	100	100	100	96.6667		92.8571	93.75	100	82.7586		100	100	100	100	100	0	0	0	0	0	97.7273	100	97.561	97.561	89.7436	90.9091	90	90.2439	88.0952	70.7317
17	100	100	100	100		96.4286	96.875	100	89.6552		100	100	100	100	100	0	0	0	0	0	100	100	100	100	94.8718	97.7273	92.5	97.561	92.8571	87.8049
18	100	100	100	100		96.4286	96.875	100	100		100	100	100	100	100	0	0	0	0	0	100	100	100	100	100	97.7273	95	100	100	97.561
19	100	100	100	100		100	100	100	100		100	100	100	100	100	0	0	0	0	0	100	100	100	100	100	100	100	100	100	100
20	100	100	100	100		100	100	100	100		100	100	100	100	100	0	0	0	0	0	100	100	100	100	100	100	100	100	100	100
21	100	100	100	100		100	100	100	100		100	100	100	100	100	0	0	0	0	0	100	100	100	100	100	100	100	100	100	100
22	100	100	100	100		100	100	100	100		100	100	100	100	100	0	0	0	0	0	100	100	100	100	100	100	100	100	100	100
23	100	100	100	100		100	100	100	100		100	100	100	100	100	0	0	0	0	0	100	100	100	100	100	100	100	100	100	100
24	100	100	100	100		100	100	100	100		100	100	100	100	100	0	0	0	0	0	100	100	100	100	100	100	100	100	100	100
