# Supplementary material for: Intestinal GCN2 controls Drosophila systemic growth in response to Lactiplantibacillus plantarum symbiotic cues encoded by r/tRNA operons
Source: eLife. 2023 Jun 9;12:e76584. doi: 10.7554/eLife.76584 (PMC10289812; doi:10.7554/eLife.76584)
Supplement: Figure 6—figure supplement 2—source data 1. [file elife-76584-fig6-figsupp2-data1.xlsx]

## Sheet: Sheet1
Figure S6A-time of development (%emerged pupae over time)
	V40-GF	V40-GF	V40-GF	V40-GF	V40-GF	V40-Ap	V40-Ap	V40-Ap	V40-Ap	V40-Ap	V40-Lp	V40-Lp	V40-Lp	V40-Lp	V40-Lp
1	0	0	0	0	0	0,0000000*	0	0,0000000*	0,0000000*	0	0	0	0	0	0
2	0	0	0	0	0	0,0000000*	0	0,0000000*	0,0000000*	0	0	0	0	0	0
3	0	0	0	0	0	0,0000000*	0	0,0000000*	0,0000000*	0	0	0	0	0	0
4	0	0	0	0	0	0,0000000*	0	0,0000000*	0,0000000*	0	0	0	0	0	0
5	0	0	0	0	0	83,3333333*	0	100,0000000*	0,0000000*	0	0	0	0	0	0
6	0	0	0	0	0	83,3333333*	0	100,0000000*	22,2222222*	0	3.84615	0	0	0	0
7	0	0	0	0	0	83,3333333*	0	100,0000000*	100,0000000*	27.5862	53.8462	5.26316	10	41.6667	0
8	0	0	0	0	0	100,0000000*	19.1489	100,0000000*	100,0000000*	82.7586	80.7692	34.2105	25	70.8333	12.766
9	0	0	0	0	0	100,0000000*	72.3404	100,0000000*	100,0000000*	100	96.1538	86.8421	77.5	91.6667	59.5745
10	6.45161	3.44828	3.0303	2.85714	0	100,0000000*	93.617	100,0000000*	100,0000000*	100	96.1538	100	97.5	95.8333	80.8511
11	25.8065	13.7931	21.2121	17.1429	28.125	100,0000000*	100	100,0000000*	100,0000000*	100	100	100	100	100	97.8723
12	64.5161	34.4828	39.3939	42.8571	43.75	100,0000000*	100	100,0000000*	100,0000000*	100	100	100	100	100	100
13	80.6452	62.069	63.6364	62.8571	68.75	100,0000000*	100	100,0000000*	100,0000000*	100	100	100	100	100	100
14	90.3226	86.2069	81.8182	82.8571	75	100,0000000*	100	100,0000000*	100,0000000*	100	100	100	100	100	100
15	93.5484	89.6552	96.9697	100	81.25	100,0000000*	100	100,0000000*	100,0000000*	100	100	100	100	100	100
16	100	93.1034	100	100	81.25	100,0000000*	100	100,0000000*	100,0000000*	100	100	100	100	100	100
17	100	100	100	100	90.625	100,0000000*	100	100,0000000*	100,0000000*	100	100	100	100	100	100
18	100	100	100	100	96.875	100,0000000*	100	100,0000000*	100,0000000*	100	100	100	100	100	100
19	100	100	100	100	100	100,0000000*	100	100,0000000*	100,0000000*	100	100	100	100	100	100
Figure S6B-time of development (%emerged pupae over time)
	mCherry-GF	mCherry-GF	mCherry-GF	mCherry-GF	mCherry-GF	mCherry-Ap	mCherry-Ap	mCherry-Ap	mCherry-Ap	mCherry-Ap	GCN2-GF	GCN2-GF	GCN2-GF	GCN2-GF	GCN2-GF	GCN2-Ap	GCN2-Ap	GCN2-Ap	GCN2-Ap	GCN2-Ap
1	0	0	0	0	0	0	0	0	0	0	0	0	0	0	0	0*	0	0	0	0
2	0	0	0	0	0	0	0	0	0	0	0	0	0	0	0	0*	0	0	0	0
3	0	0	0	0	0	0	0	0	0	0	0	0	0	0	0	0*	0	0	0	0
4	0	0	0	0	0	0	0	0	0	0	0	0	0	0	0	0*	0	0	0	0
5	0	0	0	0	0	0	0	0	0	0	0	0	0	0	0	100*	0	0	0	0
6	0	0	0	0	0	0	0	0	0	0	0	0	0	0	0	100*	0	0	0	0
7	0	0	0	0	0	0	0	10.5263	0	0	0	0	0	0	0	100*	0	0	3	0
8	0	0	0	0	0	3.0303	4.54545	26.3158	2.5	11.7647	0	0	0	0	0	100*	14	13	16	11
9	0	0	0	0	0	36.3636	27.2727	63.1579	32.5	55.8824	0	0	0	0	0	100*	68	75	65	58
10	0	0	0	0	0	96.9697	81.8182	84.2105	75	97.0588	0	0	0	0	0	100*	96	97	97	100
11	16.2791	6.97674	12.1951	15	10	100	100	100	100	100	10.3448	3.33333	3.7037	0	7.69231	100*	100	100	100	100
12	65.1163	41.8605	48.7805	42.5	60	100	100	100	100	100	55.1724	16.6667	7.40741	34.4828	28.2051	100*	100	100	100	100
13	93.0233	69.7674	82.9268	72.5	83.3333	100	100	100	100	100	86.2069	70	55.5556	86.2069	82.0513	100*	100	100	100	100
14	95.3488	88.3721	95.122	87.5	93.3333	100	100	100	100	100	93.1034	96.6667	81.4815	89.6552	94.8718	100*	100	100	100	100
15	97.6744	95.3488	100	95	96.6667	100	100	100	100	100	100	100	92.5926	93.1034	97.4359	100*	100	100	100	100
16	100	97.6744	100	97.5	100	100	100	100	100	100	100	100	96.2963	96.5517	100	100*	100	100	100	100
17	100	100	100	100	100	100	100	100	100	100	100	100	100	100	100	100*	100	100	100	100
18	100	100	100	100	100	100	100	100	100	100	100	100	100	100	100	100*	100	100	100	100
19	100	100	100	100	100	100	100	100	100	100	100	100	100	100	100	100*	100	100	100	100
Figure S6F-%positive cells/anterior midgut
GF	Ap	Lp
0	0	27.8261
0.3003	0	0.892857
0	0	6.99708
0	0.316456	40.2844
0	0	12.8743
0.275482	0	0
0	0	36.8902
0	0	49.2877
0	0.643087	51.8006
0	0	39.548
0.361011	0
