# Supplementary material for: Intestinal GCN2 controls Drosophila systemic growth in response to Lactiplantibacillus plantarum symbiotic cues encoded by r/tRNA operons
Source: eLife. 2023 Jun 9;12:e76584. doi: 10.7554/eLife.76584 (PMC10289812; doi:10.7554/eLife.76584)
Supplement: Figure 6—source data 1. [file elife-76584-fig6-data1.xlsx]

## Sheet: Sheet1
Figure 6A-time of development (%emerged pupae over time)
	mCherry_GF	mCherry_GF	mCherry_GF	mCherry_GF	mCherry_GF	mCherry_Lp	mCherry_Lp	mCherry_Lp	mCherry_Lp	mCherry_Lp	GCN2_GF	GCN2_GF	GCN2_GF	GCN2_GF	GCN2_GF	GCN2_Lp	GCN2_Lp	GCN2_Lp	GCN2_Lp	GCN2_Lp
1	0	0	0	0	0	0	0	0	0	0	0	0	0	0	0	0	0	0	0	0
2	0	0	0	0	0	0	0	0	0	0	0	0	0	0	0	0	0	0	0	0
3	0	0	0	0	0	0	0	0	0	0	0	0	0	0	0	0	0	0	0	0
4	0	0	0	0	0	0	0	0	0	0	0	0	0	0	0	0	0	0	0	0
5	0	0	0	0	0	0	0	0	0	0	0	0	0	0	0	0	0	0	0	0
6	0	0	0	0	0	0	0	0	0	0	0	0	0	0	0	0	0	0	0	0
7	0	0	0	0	0	0	0	0	0	0	0	0	0	0	0	0	0	0	0	0
8	0	0	0	0	0	0	3.125	2.77778	5.71429	5.71429	0	0	0	0	0	0	0	0	0	0
9	0	0	0	0	0	8.33333	25	22.2222	31.4286	14.2857	0	0	0	0	0	3.125	0	10.345	2.941	6.061
10	0	0	0	0	0	52.7778	65.625	69.4444	71.4286	60	0	0	0	0	0	3.125	24.242	41.379	2.941	12.121
11	16.6667	0	2.38095	0	2.32558	91.6667	90.625	97.2222	85.7143	82.8571	2.5641	0	0	0	0	25	48.485	58.621	14.706	36.364
12	64.5833	20.4545	14.2857	13.1579	6.97674	97.2222	100	100	97.1429	91.4286	43.5897	13.8889	5.40541	0	0	31.25	66.667	86.207	38.235	57.576
13	83.3333	45.4545	61.9048	47.3684	41.8605	100	100	100	100	94.2857	84.6154	63.8889	43.2432	39.0244	33.3333	50	78.788	89.655	52.941	72.727
14	93.75	72.7273	80.9524	76.3158	76.7442	100	100	100	100	100	97.4359	88.8889	89.1892	75.6098	88.8889	62.5	84.848	93.103	61.765	81.818
15	95.8333	95.4545	92.8571	97.3684	95.3488	100	100	100	100	100	100	94.4444	97.2973	90.2439	94.4444	65.625	87.879	93.103	73.529	93.939
16	97.9167	95.4545	92.8571	100	97.6744	100	100	100	100	100	100	100	100	97.561	100	81.25	90.909	96.552	76.471	100
17	100	97.7273	95.2381	100	97.6744	100	100	100	100	100	100	100	100	97.561	100	84.375	96.97	96.552	79.412	100
18	100	100	97.619	100	100	100	100	100	100	100	100	100	100	100	100	87.5	100	100	88.235	100
19	100	100	100	100	100	100	100	100	100	100	100	100	100	100	100	93.75	100	100	91.176	100
20	100	100	100	100	100	100	100	100	100	100	100	100	100	100	100	96.875	100	100	94.118	100
21	100	100	100	100	100	100	100	100	100	100	100	100	100	100	100	100	100	100	97.059	100
22	100	100	100	100	100	100	100	100	100	100	100	100	100	100	100	100	100	100	100	100
23	100	100	100	100	100	100	100	100	100	100	100	100	100	100	100	100	100	100	100	100
Figure 6B-time of development (%emerged pupae over time)
	GF-mCherry	GF-mCherry	GF-mCherry	GF-mCherry	GF-mCherry	Lp-mCherry	Lp-mCherry	Lp-mCherry	Lp-mCherry	Lp-mCherry	GF-GCN2	GF-GCN2	GF-GCN2	GF-GCN2	GF-GCN2	Lp-GCN2	Lp-GCN2	Lp-GCN2	Lp-GCN2	Lp-GCN2
1	0	0	0	0	0	0	0	0	0	0	0	0	0	0	0	0	0	0	0	0
2	0	0	0	0	0	0	0	0	0	0	0	0	0	0	0	0	0	0	0	0
3	0	0	0	0	0	0	0	0	0	0	0	0	0	0	0	0	0	0	0	0
4	0	0	0	0	0	0	0	0	0	0	0	0	0	0	0	0	0	0	0	0
5	0	0	0	0	0	0	0	0	0	0	0	0	0	0	0	0	0	0	0	0
6	0	0	0	0	0	20.5128	43.3333	30.5556	6.12245	12	0	0	0	0	0	0	0	20	0	0
7	2.63158	0	8.33333	8.10811	11.3636	87.1795	76.6667	86.1111	75.5102	84	0	0	0	2.6	0	79.1667	54.0541	86.6667	87.5	79.4118
8	60.5263	42.8571	61.1111	83.7838	72.7273	97.4359	93.3333	100	97.9592	94	67.5	65.1	74.3	63.2	75	100	94.5946	100	100	97.0588
9	81.5789	95.2381	94.4444	91.8919	95.4545	100	100	100	100	98	90	93	97.1	89.5	90.6	100	97.2973	100	100	100
10	94.7368	100	100	97.2973	100	100	100	100	100	100	95	97.7	97.1	94.7	100	100	100	100	100	100
11	100	100	100	100	100	100	100	100	100	100	95	100	97.1	100	100	100	100	100	100	100
12	100	100	100	100	100	100	100	100	100	100	100	100	100	100	100	100	100	100	100	100
13	100	100	100	100	100	100	100	100	100	100	100	100	100	100	100	100	100	100	100	100
14	100	100	100	100	100	100	100	100	100	100	100	100	100	100	100	100	100	100	100	100
Figure 6C-time of development (%emerged pupae over time)
	mCherry-Ile_GF	mCherry-Ile_GF	mCherry-Ile_GF	mCherry-Ile_GF	mCherry-Ile_GF	mCherry-Ile_Lp	mCherry-Ile_Lp	mCherry-Ile_Lp	mCherry-Ile_Lp	mCherry-Ile_Lp	GCN2-Ile_GF	GCN2-Ile_GF	GCN2-Ile_GF	GCN2-Ile_GF	GCN2-Ile_GF	GCN2-Ile_Lp	GCN2-Ile_Lp	GCN2-Ile_Lp	GCN2-Ile_Lp	GCN2-Ile_Lp
1	0	0	0	0	0	0	0	0	0	0	0	0	0	0	0	0	0	0	0	0
2	0	0	0	0	0	0	0	0	0	0	0	0	0	0	0	0	0	0	0	0
3	0	0	0	0	0	0	0	0	0	0	0	0	0	0	0	0	0	0	0	0
4	0	0	0	0	0	0	0	0	0	0	0	0	0	0	0	0	0	0	0	0
5	0	0	0	0	0	0	0	0	0	0	0	0	0	0	0	0	0	0	0	0
6	0	0	0	0	0	0	0	0	0	0	0	0	0	0	0	0	0	0	0	0
7	0	0	0	0	0	12	0	0	0	3	0	0	0	0	0	0	0	0	0	0
8	0	0	0	0	0	60	9	3	5	11	0	0	0	0	0	3.0303	0	8.10811	0	5.55556
9	0	0	0	0	0	92	41	53	43	50	0	0	0	0	0	6.06061	0	16.2162	2.85714	22.2222
10	0	0	0	9.09091	0	96	65	82	68	81	9.52381	0	0	0	8.82353	15.1515	12.5	24.3243	8.57143	41.6667
11	0	2.94118	13.7931	15.1515	4.16667	96	88	91	86	100	23.8095	8	16.6667	10.3448	23.5294	45.4545	25	54.0541	34.2857	69.4444
12	13.7931	8.82353	20.6897	30.303	12.5	100	100	91	95	100	28.5714	32	33.3333	24.1379	44.1176	66.6667	57.5	78.3784	74.2857	80.5556
13	17.2414	20.5882	24.1379	33.3333	16.6667	100	100	94	95	100	42.8571	44	41.6667	41.3793	52.9412	81.8182	67.5	94.5946	88.5714	94.4444
14	31.0345	29.4118	34.4828	39.3939	33.3333	100	100	100	100	100	57.1429	56	62.5	55.1724	61.7647	93.9394	85	97.2973	100	97.2222
15	51.7241	38.2353	48.2759	42.4242	45.8333	100	100	100	100	100	76.1905	72	75	62.069	79.4118	93.9394	95	97.2973	100	100
16	62.069	52.9412	55.1724	45.4545	45.8333	100	100	100	100	100	76.1905	88	83.3333	72.4138	88.2353	100	100	100	100	100
17	65.5172	58.8235	62.069	51.5152	62.5	100	100	100	100	100	85.7143	92	87.5	82.7586	94.1176	100	100	100	100	100
18	72.4138	64.7059	65.5172	66.6667	79.1667	100	100	100	100	100	100	100	100	89.6552	97.0588	100	100	100	100	100
19	82.7586	76.4706	72.4138	72.7273	79.1667	100	100	100	100	100	100	100	100	93.1034	100	100	100	100	100	100
20	82.7586	79.4118	75.8621	78.7879	83.3333	100	100	100	100	100	100	100	100	100	100	100	100	100	100	100
21	86.2069	88.2353	86.2069	87.8788	87.5	100	100	100	100	100	100	100	100	100	100	100	100	100	100	100
22	93.1034	94.1176	93.1034	87.8788	91.6667	100	100	100	100	100	100	100	100	100	100	100	100	100	100	100
23	96.5517	97.0588	100	96.9697	95.8333	100	100	100	100	100	100	100	100	100	100	100	100	100	100	100
24	100	100	100	100	100	100	100	100	100	100	100	100	100	100	100	100	100	100	100	100
25	100	100	100	100	100	100	100	100	100	100	100	100	100	100	100	100	100	100	100	100
26	100	100	100	100	100	100	100	100	100	100	100	100	100	100	100	100	100	100	100	100
Figure 6D-time of development (%emerged pupae over time)
	mCherry-LYS_GF	mCherry-LYS_GF	mCherry-LYS_GF	mCherry-LYS_GF	mCherry-LYS_GF	mCherry-Lys_Lp	mCherry-Lys_Lp	mCherry-Lys_Lp	mCherry-Lys_Lp	mCherry-Lys_Lp	GCN2-Lys_GF	GCN2-Lys_GF	GCN2-Lys_GF	GCN2-Lys_GF	GCN2-Lys_GF	GCN2-Lys_Lp	GCN2-Lys_Lp	GCN2-Lys_Lp	GCN2-Lys_Lp	GCN2-Lys_Lp
1	0	0	0	0	0	0	0	0	0	0	0	0	0	0	0	0	0	0	0	0
2	0	0	0	0	0	0	0	0	0	0	0	0	0	0	0	0	0	0	0	0
3	0	0	0	0	0	0	0	0	0	0	0	0	0	0	0	0	0	0	0	0
4	0	0	0	0	0	0	0	0	0	0	0	0	0	0	0	0	0	0	0	0
5	0	0	0	0	0	0	0	0	0	0	0	0	0	0	0	0	0	0	0	0
6	0	0	0	0	0	0	0	0	3.125	5.88235	0	0	0	0	0	0	0	0	0	0
7	0	0	0	0	0	8.82353	23.5294	12.1212	31.25	29.4118	0	0	0	0	0	40	8.8	0	18.8	5.6
8	0	0	0	0	0	44.1176	52.9412	60.6061	62.5	67.6471	0	0	0	0	0	80	55.9	15	62.5	58.3
9	0	0	0	0	0	88.2353	79.4118	75.7576	84.375	88.2353	0	0	0	0	0	100	82.4	70	96.9	97.2
10	0	0	0	0	0	100	97.0588	93.9394	96.875	100	0	0	0	0	0	100	100	95	100	100
11	0	0	0	0	0	100	100	100	100	100	0	0	0	0	0	100	100	100	100	100
12	4.7619	0	0	0	0	100	100	100	100	100	0	0	2.38095	0	0	100	100	100	100	100
13	19.0476	11.7647	11.7647	0	13.8889	100	100	100	100	100	11.4286	4.87805	7.14286	2.38095	2.43902	100	100	100	100	100
14	59.5238	44.1176	44.1176	30.303	47.2222	100	100	100	100	100	77.1429	39.0244	50	33.3333	36.5854	100	100	100	100	100
15	92.8571	85.2941	76.4706	75.7576	88.8889	100	100	100	100	100	94.2857	80.4878	80.9524	69.0476	68.2927	100	100	100	100	100
16	95.2381	100	97.0588	87.8788	91.6667	100	100	100	100	100	97.1429	97.561	95.2381	92.8571	92.6829	100	100	100	100	100
17	97.619	100	100	100	100	100	100	100	100	100	100	100	100	100	97.561	100	100	100	100	100
18	97.619	100	100	100	100	100	100	100	100	100	100	100	100	100	97.561	100	100	100	100	100
19	100	100	100	100	100	100	100	100	100	100	100	100	100	100	100	100	100	100	100	100
20	100	100	100	100	100	100	100	100	100	100	100	100	100	100	100	100	100	100	100	100
21	100	100	100	100	100	100	100	100	100	100	100	100	100	100	100	100	100	100	100	100
22	100	100	100	100	100	100	100	100	100	100	100	100	100	100	100	100	100	100	100	100
Figure 6E-time of development (%emerged pupae over time)
	mCherry-Thr_GF	mCherry-Thr_GF	mCherry-Thr_GF	mCherry-Thr_GF	mCherry-Thr_GF	mCherry-Thr_Lp	mCherry-Thr_Lp	mCherry-Thr_Lp	mCherry-Thr_Lp	mCherry-Thr_Lp	GCN2-thr_GF	GCN2-thr_GF	GCN2-thr_GF	GCN2-thr_GF	GCN2-thr_GF	GCN2-Thr_Lp	GCN2-Thr_Lp	GCN2-Thr_Lp	GCN2-Thr_Lp	GCN2-Thr_Lp
1	0	0	0	0	0	0	0	0	0	0	0	0	0	0	0	0	0	0	0	0
2	0	0	0	0	0	0	0	0	0	0	0	0	0	0	0	0	0	0	0	0
3	0	0	0	0	0	0	0	0	0	0	0	0	0	0	0	0	0	0	0	0
4	0	0	0	0	0	0	0	0	0	0	0	0	0	0	0	0	0	0	0	0
5	0	0	0	0	0	0	0	0	0	0	0	0	0	0	0	0	0	0	0	0
6	0	0	0	0	0	62.5	43.75	76.9231	44.4444	76.4706	0	0	0	0	0	0	0	0	0	0
7	0	0	0	0	0	93.75	87.5	84.6154	94.4444	100	0	0	0	0	0	17.6471	29.6296	33.3333	28.125	31.25
8	0	0	0	0	0	100	93.75	92.3077	100	100	0	0	0	0	0	52.9412	70.3704	88.8889	71.875	62.5
9	0	0	0	0	0	100	100	100	100	100	0	0	0	0	0	88.2353	92.5926	100	96.875	87.5
10	5.40541	0	0	0	0	100	100	100	100	100	0	0	0	0	0	94.1176	100	100	100	96.875
11	18.9189	15.625	7.89474	6.25	7.40741	100	100	100	100	100	9.67742	16.2162	2.5	0	6.45161	97.0588	100	100	100	100
12	45.9459	53.125	34.2105	34.375	37.037	100	100	100	100	100	48.3871	54.0541	32.5	44	41.9355	100	100	100	100	100
13	75.6757	68.75	81.5789	65.625	74.0741	100	100	100	100	100	87.0968	75.6757	75	80	83.871	100	100	100	100	100
14	83.7838	75	94.7368	84.375	96.2963	100	100	100	100	100	93.5484	91.8919	85	96	100	100	100	100	100	100
15	94.5946	84.375	100	90.625	100	100	100	100	100	100	93.5484	91.8919	92.5	100	100	100	100	100	100	100
16	97.2973	90.625	100	90.625	100	100	100	100	100	100	96.7742	97.2973	97.5	100	100	100	100	100	100	100
17	97.2973	93.75	100	93.75	100	100	100	100	100	100	100	97.2973	97.5	100	100	100	100	100	100	100
18	100	100	100	96.875	100	100	100	100	100	100	100	100	100	100	100	100	100	100	100	100
19	100	100	100	100	100	100	100	100	100	100	100	100	100	100	100	100	100	100	100	100
20	100	100	100	100	100	100	100	100	100	100	100	100	100	100	100	100	100	100	100	100
Figure 6F-time of development (%emerged pupae over time)
	mCherry-Trp_GF	mCherry-Trp_GF	mCherry-Trp_GF	mCherry-Trp_GF	mCherry-Trp_GF	mCherry-Trp_Lp	mCherry-Trp_Lp	mCherry-Trp_Lp	mCherry-Trp_Lp	mCherry-Trp_Lp	GCN2-Trp_GF	GCN2-Trp_GF	GCN2-Trp_GF	GCN2-Trp_GF	GCN2-Trp_GF	GCN2-Trp_Lp	GCN2-Trp_Lp	GCN2-Trp_Lp	GCN2-Trp_Lp	GCN2-Trp_Lp
1	0	0	0	0	0	0	0	0	0	0	0	0	0	0	0	0	0	0	0	0
2	0	0	0	0	0	0	0	0	0	0	0	0	0	0	0	0	0	0	0	0
3	0	0	0	0	0	0	0	0	0	0	0	0	0	0	0	0	0	0	0	0
4	0	0	0	0	0	0	0	0	0	0	0	0	0	0	0	0	0	0	0	0
5	0	0	0	0	0	0	0	0	0	0	0	0	0	0	0	0	0	0	0	0
6	0	0	0	0	0	0	0	0	0	0	0	0	0	0	0	0	0	0	0	0
7	0	0	0	0	0	0	0	0	0	18.5185	0	0	0	0	0	3.33333	0	0	0	0
8	0	0	0	0	0	0	0	0	2.77778	40.7407	0	0	0	0	0	6.66667	2.77778	5.40541	5.55556	3.125
9	0	0	0	0	0	2.08333	13.1579	17.5	19.4444	66.6667	0	0	0	0	0	23.3333	11.1111	18.9189	19.4444	21.875
10	0	0	0	0	0	27.0833	65.7895	40	61.1111	92.5926	0	0	0	0	0	56.6667	44.4444	51.3514	36.1111	50
11	0	0	0	0	0	72.9167	97.3684	95	94.4444	100	0	0	0	2.63158	0	90	69.4444	83.7838	72.2222	87.5
12	12.5	2.85714	3.125	3.22581	0	95.8333	100	95	97.2222	100	23.6842	15.9091	13.8889	34.2105	20	96.6667	94.4444	94.5946	88.8889	93.75
13	43.75	31.4286	12.5	16.129	3.22581	95.8333	100	97.5	97.2222	100	55.2632	63.6364	50	68.4211	57.1429	100	97.2222	100	100	100
14	75	57.1429	50	41.9355	22.5806	100	100	100	100	100	81.5789	88.6364	66.6667	92.1053	77.1429	100	100	100	100	100
15	84.375	85.7143	78.125	70.9677	58.0645	100	100	100	100	100	89.4737	95.4545	91.6667	94.7368	91.4286	100	100	100	100	100
16	90.625	94.2857	90.625	90.3226	87.0968	100	100	100	100	100	94.7368	97.7273	94.4444	97.3684	97.1429	100	100	100	100	100
17	96.875	97.1429	93.75	90.3226	93.5484	100	100	100	100	100	100	97.7273	97.2222	100	97.1429	100	100	100	100	100
18	100	100	93.75	96.7742	96.7742	100	100	100	100	100	100	100	100	100	100	100	100	100	100	100
19	100	100	96.875	96.7742	100	100	100	100	100	100	100	100	100	100	100	100	100	100	100	100
20	100	100	100	100	100	100	100	100	100	100	100	100	100	100	100	100	100	100	100	100
21	100	100	100	100	100	100	100	100	100	100	100	100	100	100	100	100	100	100	100	100
22	100	100	100	100	100	100	100	100	100	100	100	100	100	100	100	100	100	100	100	100
Figure 6G-time of development (%emerged pupae over time)
	>mCherryRNAi_GF	>mCherryRNAi_GF	>mCherryRNAi_GF	>mCherryRNAi_GF	>mCherryRNAi_GF	>mCherryRNAi_Lp	>mCherryRNAi_Lp	>mCherryRNAi_Lp	>mCherryRNAi_Lp	>mCherryRNAi_Lp	>ATF4RNAi_GF	>ATF4RNAi_GF	>ATF4RNAi_GF	>ATF4RNAi_GF	>ATF4RNAi_GF	>ATF4RNAi_Lp	>ATF4RNAi_Lp	>ATF4RNAi_Lp	>ATF4RNAi_Lp	>ATF4RNAi_Lp	>ThorRNAi_GF	>ThorRNAi_GF	>ThorRNAi_GF	>ThorRNAi_GF	>ThorRNAi_GF	>ThorRNAi_Lp	>ThorRNAi_Lp	>ThorRNAi_Lp	>ThorRNAi_Lp	>ThorRNAi_Lp
1	0	0	0	0	0	0	0	0	0	0	0	0	0	0	0	0	0	0	0	0	0	0	0	0	0	0	0	0	0	0
2	0	0	0	0	0	0	0	0	0	0	0	0	0	0	0	0	0	0	0	0	0	0	0	0	0	0	0	0	0	0
3	0	0	0	0	0	0	0	0	0	0	0	0	0	0	0	0	0	0	0	0	0	0	0	0	0	0	0	0	0	0
4	0	0	0	0	0	0	0	0	0	0	0	0	0	0	0	0	0	0	0	0	0	0	0	0	0	0	0	0	0	0
5	0	0	0	0	0	0	0	0	0	0	0	0	0	0	0	0	0	0	0	0	0	0	0	0	0	0	0	0	0	0
6	0	0	0	0	0	0	0	0	0	0	0	0	0	0	0	0	0	0	0	0	0	0	0	0	0	0	0	0	0	0
7	0	0	0	0	0	0	0	0	0	0	0	0	0	0	0	0	0	0	0	0	0	0	0	0	0	15	0	0	0	0
8	0	0	0	0	0	2.12766	0	1.75439	5.71429	0	0	0	0	0	0	4	0	4	0	4	0	0	0	0	0	35	3	0	0	0
9	0	0	0	0	0	25.5319	14.5455	10.5263	5.71429	21.9512	0	0	0	0	0	12	16	4	22	20	0	0	0	0	0	85	10	13	8	35
10	0	0	0	0	0	48.9362	47.2727	38.5965	57.1429	63.4146	0	0	0	0	0	24	48	24	78	36	0	0	0	0	0	100	45	53	69	65
11	26.1905	13.9535	18.4211	11.9048	7.31707	65.9574	69.0909	64.9123	94.2857	85.3659	0	0	0	0	0	56	72	36	96	84	0	0	0	0	0	100	71	83	88	92
12	73.8095	53.4884	60.5263	59.5238	48.7805	100	100	98.2456	97.1429	90.2439	17.2414	3.44828	15.3846	0	16	76	88	84	100	88	3.44828	3.84615	7.14286	18.75	0	100	77	97	96	100
13	92.8571	90.6977	92.1053	90.4762	87.8049	100	100	100	100	90.2439	44.8276	17.2414	42.3077	30.4348	44	84	100	100	100	96	20.6897	26.9231	17.8571	21.875	19.2308	100	84	97	100	100
14	95.2381	93.0233	100	95.2381	95.122	100	100	100	100	90.2439	68.9655	37.931	69.2308	52.1739	56	88	100	100	100	100	37.931	42.3077	42.8571	53.125	26.9231	100	94	100	100	100
15	100	100	100	97.619	97.561	100	100	100	100	100	75.8621	65.5172	80.7692	73.913	76	96	100	100	100	100	65.5172	65.3846	75	71.875	57.6923	100	100	100	100	100
16	100	100	100	100	100	100	100	100	100	100	86.2069	89.6552	88.4615	86.9565	88	96	100	100	100	100	75.8621	80.7692	92.8571	90.625	76.9231	100	100	100	100	100
17	100	100	100	100	100	100	100	100	100	100	93.1034	96.5517	96.1538	95.6522	92	100	100	100	100	100	96.5517	96.1538	92.8571	93.75	88.4615	100	100	100	100	100
18	100	100	100	100	100	100	100	100	100	100	93.1034	100	100	95.6522	100	100	100	100	100	100	100	100	100	100	92.3077	100	100	100	100	100
19	100	100	100	100	100	100	100	100	100	100	100	100	100	100	100	100	100	100	100	100	100	100	100	100	100	100	100	100	100	100
20	100	100	100	100	100	100	100	100	100	100	100	100	100	100	100	100	100	100	100	100	100	100	100	100	100	100	100	100	100	100
21	100	100	100	100	100	100	100	100	100	100	100	100	100	100	100	100	100	100	100	100	100	100	100	100	100	100	100	100	100	100
22	100	100	100	100	100	100	100	100	100	100	100	100	100	100	100	100	100	100	100	100	100	100	100	100	100	100	100	100	100	100
23	100	100	100	100	100	100	100	100	100	100	100	100	100	100	100	100	100	100	100	100	100	100	100	100	100	100	100	100	100	100
24	100	100	100	100	100	100	100	100	100	100	100	100	100	100	100	100	100	100	100	100	100	100	100	100	100	100	100	100	100	100
25	100	100	100	100	100	100	100	100	100	100	100	100	100	100	100	100	100	100	100	100	100	100	100	100	100	100	100	100	100	100
Figure 6H-time of development (%emerged pupae over time)
	mCherry GF	mCherry GF	mCherry GF	mCherry GF	mCherry GF	mCherry-B2.4	mCherry-B2.4	mCherry-B2.4	mCherry-B2.4	mCherry-B2.4	mCherry-F7.8	mCherry-F7.8	mCherry-F7.8	mCherry-F7.8	mCherry-F7.8
1	0	0	0	0	0	0	0	0	0	0	0	0	0	0	0
2	0	0	0	0	0	0	0	0	0	0	0	0	0	0	0
3	0	0	0	0	0	0	0	0	0	0	0	0	0	0	0
4	0	0	0	0	0	0	0	0	0	0	0	0	0	0	0
5	0	0	0	0	0	0	0	0	0	0	0	0	0	0	0
6	0	0	0	0	0	0	0	0	0	0	0	0	0	0	0
7	0	0	0	0	0	0	0	0	0	0	0	0	0	0	0
8	0	0	0	0	0	3.33333	0	0	0	0	0	0	0	0	0
9	0	0	0	0	0	10	0	2.77778	0	0	0	0	0	0	0
10	0	0	0	0	0	73.3333	31.5789	47.2222	26.8293	41.0256	2.94118	8.10811	1.96078	4.16667	14.2857
11	0	0	0	0	0	93.3333	57.8947	83.3333	70.7317	71.7949	17.6471	29.7297	9.80392	25	42.8571
12	36.8421	0	6.06061	2.63158	0	100	84.2105	94.4444	92.6829	97.4359	47.0588	75.6757	27.451	56.25	80
13	71.0526	34.6154	33.3333	26.3158	15.3846	100	92.1053	97.2222	100	100	82.3529	97.2973	58.8235	75	97.1429
14	89.4737	65.3846	78.7879	76.3158	73.0769	100	94.7368	100	100	100	91.1765	100	86.2745	91.6667	100
15	94.7368	92.3077	96.9697	92.1053	100	100	100	100	100	100	94.1176	100	98.0392	100	100
16	94.7368	96.1538	100	100	100	100	100	100	100	100	97.0588	100	100	100	100
17	100	100	100	100	100	100	100	100	100	100	97.0588	100	100	100	100
18	100	100	100	100	100	100	100	100	100	100	100	100	100	100	100
19	100	100	100	100	100	100	100	100	100	100	100	100	100	100	100
20	100	100	100	100	100	100	100	100	100	100	100	100	100	100	100
Figure 6I-time of development (%emerged pupae over time)
	GCN2 GF	GCN2 GF	GCN2 GF	GCN2 GF	GCN2 GF	GCN2-B2.4	GCN2-B2.4	GCN2-B2.4	GCN2-B2.4	GCN2-B2.4	GCN2-F7.8	GCN2-F7.8	GCN2-F7.8	GCN2-F7.8	GCN2-F7.8
1	0	0	0	0	0	0	0	0	0	0	0	0	0	0	0
2	0	0	0	0	0	0	0	0	0	0	0	0	0	0	0
3	0	0	0	0	0	0	0	0	0	0	0	0	0	0	0
4	0	0	0	0	0	0	0	0	0	0	0	0	0	0	0
5	0	0	0	0	0	0	0	0	0	0	0	0	0	0	0
6	0	0	0	0	0	0	0	0	0	0	0	0	0	0	0
7	0	0	0	0	0	0	0	0	0	0	0	0	0	0	0
8	0	0	0	0	0	0	0	0	5	7.69231	0	0	0	0	0
9	0	0	0	0	0	0	0	0	25	26.9231	11.1111	5.88235	9.52381	0	35.7143
10	0	0	0	0	0	0	10.3448	6.66667	75	61.5385	50	35.2941	23.8095	16	64.2857
11	2.32558	0	0	0	0	8.57143	27.5862	33.3333	90	69.2308	77.7778	47.0588	47.619	28	71.4286
12	37.2093	40	3.7037	0	5.55556	25.7143	48.2759	60	100	88.4615	77.7778	64.7059	52.381	36	71.4286
13	79.0698	76.6667	44.4444	37.931	50	42.8571	75.8621	70	100	92.3077	83.3333	76.4706	71.4286	52	100
14	90.6977	96.6667	85.1852	82.7586	86.1111	54.2857	86.2069	76.6667	100	100	88.8889	100	85.7143	60	100
15	93.0233	96.6667	88.8889	93.1034	94.4444	65.7143	100	86.6667	100	100	88.8889	100	85.7143	68	100
16	97.6744	100	92.5926	96.5517	97.2222	74.2857	100	93.3333	100	100	100	100	100	84	100
17	100	100	100	96.5517	100	85.7143	100	100	100	100	100	100	100	92	100
18	100	100	100	100	100	94.2857	100	100	100	100	100	100	100	100	100
19	100	100	100	100	100	100	100	100	100	100	100	100	100	100	100
20	100	100	100	100	100	100	100	100	100	100	100	100	100	100	100
