# Supplementary material for: Intestinal GCN2 controls Drosophila systemic growth in response to Lactiplantibacillus plantarum symbiotic cues encoded by r/tRNA operons
Source: eLife. 2023 Jun 9;12:e76584. doi: 10.7554/eLife.76584 (PMC10289812; doi:10.7554/eLife.76584)
Supplement: Figure 7—source data 1. [file elife-76584-fig7-data1.xlsx]

## Sheet: Sheet1
	Comparison		Direction of Expression
	Test	Control	Up-regulated	Down-regulated
Filter 1	Control Lp	Control GF	Up	Down
Filter 2	Lp:Tncontrol	Lp:Tnr/tRNA	Up	Down
Filter 3	Control Lp	ATF4 Lp	Down, NA	Up, NA
Filter 4	Control Lp	GCN2 Lp	Up	Down
