# Supplementary material for: Intestinal GCN2 controls Drosophila systemic growth in response to Lactiplantibacillus plantarum symbiotic cues encoded by r/tRNA operons
Source: eLife. 2023 Jun 9;12:e76584. doi: 10.7554/eLife.76584 (PMC10289812; doi:10.7554/eLife.76584)
Supplement: Figure 8—source data 1. [file elife-76584-fig8-data1.xlsx]

## Sheet: Sheet1
Figure 8A-normalized counts of fezzik RNA
	KK-F0708					KK-B0204					GCN2-Lp					KK-Lp					ATF4-Lp					KK-GF
fiz	192.276	240.429	224.009	139.938	282.478	77.5835	164.391	95.9088	102.947	144.213	569.769	525.904	621.701	384.428	617.726	257.371	332.023	203.805	285.446	278.757	119.716	166.848	147.629	261.369	243.651	905.695	958.14	1641.74	831.389	982.511
Figure 8B-time of development (%emerged pupae over time)
	fiz-nc8					fiz-dOp					fiz-GF					mCherry-NC8					mCherry-dOp					mCherry-GF
1	0	0	0	0	0	0	0	0	0	0	0	0	0	0	0	0	0	0	0	0	0	0	0	0	0	0	0	0	0
2	0	0	0	0	0	0	0	0	0	0	0	0	0	0	0	0	0	0	0	0	0	0	0	0	0	0	0	0	0
3	0	0	0	0	0	0	0	0	0	0	0	0	0	0	0	0	0	0	0	0	0	0	0	0	0	0	0	0	0
4	0	0	0	0	0	0	0	0	0	0	0	0	0	0	0	0	0	0	0	0	0	0	0	0	0	0	0	0	0
5	0	0	0	0	0	0	0	0	0	0	0	0	0	0	0	0	0	0	0	0	0	0	0	0	0	0	0	0	0
6	25	25	0	0	28.5714	0	0	0	0	0	0	0	0	0	0	0	0	0	0	0	0	0	0	0	0	0	0	0	0
7	81.25	75	7.69231	43.4783	100	18.1818	0	0	20	0	0	0	0	0	45.8333	16.129	3.0303	6.89655	11.7647	0	0	0	0	0	0	0	0	0	0
8	100	93.75	57.6923	69.5652	100	81.8182	0	4.34783	70	0	0	0	0	0	83.3333	22.5806	12.1212	17.2414	20.5882	0	0	0	0	0	0	0	0	0	0
9	100	100	96.1538	91.3043	100	90.9091	16	26.087	100	0	0	0	0	0	87.5	74.1935	63.6364	79.3103	58.8235	37.5	0	0	0	0	0	0	0	0	0
10	100	100	100	100	100	90.9091	56	69.5652	100	0	6.25	0	0	0	100	93.5484	90.9091	89.6552	88.2353	79.1667	12.9032	6.06061	6.66667	18.1818	0	0	0	0	0
11	100	100	100	100	100	100	88	82.6087	100	16.6667	18.75	16.6667	11.1111	17.3913	100	96.7742	93.9394	96.5517	100	91.6667	48.3871	27.2727	53.3333	60.6061	4.34783	0	4	0	5
12	100	100	100	100	100	100	100	86.9565	100	61.1111	68.75	72.2222	51.8519	82.6087	100	100	100	100	100	100	96.7742	93.9394	90	90.9091	60.8696	36.8421	28	18.5185	50
13	100	100	100	100	100	100	100	95.6522	100	94.4444	93.75	100	66.6667	95.6522	100	100	100	100	100	100	100	96.9697	96.6667	96.9697	78.2609	68.4211	88	59.2593	80
14	100	100	100	100	100	100	100	95.6522	100	100	100	100	92.5926	100	100	100	100	100	100	100	100	96.9697	100	100	86.9565	94.7368	100	77.7778	90
15	100	100	100	100	100	100	100	100	100	100	100	100	96.2963	100	100	100	100	100	100	100	100	100	100	100	91.3043	100	100	92.5926	100
16	100	100	100	100	100	100	100	100	100	100	100	100	100	100	100	100	100	100	100	100	100	100	100	100	100	100	100	100	100
17	100	100	100	100	100	100	100	100	100	100	100	100	100	100	100	100	100	100	100	100	100	100	100	100	100	100	100	100	100
18	100	100	100	100	100	100	100	100	100	100	100	100	100	100	100	100	100	100	100	100	100	100	100	100	100	100	100	100	100
19	100	100	100	100	100	100	100	100	100	100	100	100	100	100	100	100	100	100	100	100	100	100	100	100	100	100	100	100	100
