# Supplementary material for: Intestinal GCN2 controls Drosophila systemic growth in response to Lactiplantibacillus plantarum symbiotic cues encoded by r/tRNA operons
Source: eLife. 2023 Jun 9;12:e76584. doi: 10.7554/eLife.76584 (PMC10289812; doi:10.7554/eLife.76584)
Supplement: Figure 8—source data 2. [file elife-76584-fig8-data2.xlsx]

## Sheet: Sheet1
Figure S8-expression of fezzik
Mex>mCherryRNAi	Mex>fezzikRNAi
0.0402362	0.00668369
0.0315376	0.0150744
0.038745	0.0123231
0.0322873	0.0137483
	0.0125919
